# Supplementary material
Source: Royal Society of Chemistry journal article supplement (doi:10.1039/d6dt00460a)

## *Supplementary Material*

# **Synthesis, Crystal Structures and Urease Inhibition of Ni(II) complexes Constructed from Schiff bases with 2,2'-bipyridine as co-ligands**

Wen-yang Liu<sup>1†</sup> Hong-lei Li<sup>2†</sup>, Jiang-song Jia<sup>1</sup>, Wen-ming Zhao<sup>1</sup> and Jun Sun<sup>1,\*</sup>

<sup>1</sup>Department of Pharmacy, Henan Provincial People's Hospital; People's Hospital of Zhengzhou University; People's Hospital of Henan University, Zhengzhou, Henan, 450003, China;

<sup>2</sup>Department of Pharmacy, Kangda College of Nanjing Medical University, Lianyungang, 222000, China;

\*Correspondence: SJun@zzu.edu.cn; Tel.: (86-371-65580213)

† These authors contributed equally to this work

## 1. Structure Tables

|                                                                 | C1                                                                              | C2                                                                             | C3                                                                                            |
|-----------------------------------------------------------------|---------------------------------------------------------------------------------|--------------------------------------------------------------------------------|-----------------------------------------------------------------------------------------------|
| CCDC number                                                     | 2524848                                                                         | 2524939                                                                        | 2524846                                                                                       |
| Empirical formula                                               | C <sub>28</sub> H <sub>29</sub> Cl <sub>2</sub> N <sub>3</sub> NiO <sub>6</sub> | C <sub>17</sub> H <sub>21</sub> Cl <sub>2</sub> NNiO <sub>7</sub>              | C <sub>52</sub> H <sub>44</sub> Cl <sub>4</sub> N <sub>6</sub> Ni <sub>2</sub> O <sub>9</sub> |
| Formula weight                                                  | 633.15                                                                          | 480.96                                                                         | 1155.14                                                                                       |
| Temperature [K]                                                 | 115.0                                                                           | 116.0                                                                          | 302.00                                                                                        |
| Crystal system                                                  | triclinic                                                                       | orthorhombic                                                                   | triclinic                                                                                     |
| Space group (number)                                            | $P\bar{1}$ (2)                                                                  | $P2_12_12_1$ (19)                                                              | $P\bar{1}$ (2)                                                                                |
| <i>a</i> [Å]                                                    | 9.4508(6)                                                                       | 7.0996(8)                                                                      | 11.081(4)                                                                                     |
| <i>b</i> [Å]                                                    | 11.9832(8)                                                                      | 7.9070(9)                                                                      | 15.530(5)                                                                                     |
| <i>c</i> [Å]                                                    | 13.2510(7)                                                                      | 35.205(4)                                                                      | 16.391(4)                                                                                     |
| $\alpha$ [°]                                                    | 86.307(2)                                                                       | 90                                                                             | 68.900(7)                                                                                     |
| $\beta$ [°]                                                     | 81.250(2)                                                                       | 90                                                                             | 80.093(8)                                                                                     |
| $\gamma$ [°]                                                    | 69.766(2)                                                                       | 90                                                                             | 81.532(10)                                                                                    |
| Volume [Å <sup>3</sup> ]                                        | 1391.58(15)                                                                     | 1976.3(4)                                                                      | 2581.1(14)                                                                                    |
| <i>Z</i>                                                        | 2                                                                               | 4                                                                              | 2                                                                                             |
| $\rho_{\text{calc}}$ [gcm <sup>-3</sup> ]                       | 1.511                                                                           | 1.616                                                                          | 1.486                                                                                         |
| $\mu$ [mm <sup>-1</sup> ]                                       | 0.937                                                                           | 1.292                                                                          | 0.999                                                                                         |
| <i>F</i> (000)                                                  | 656                                                                             | 992                                                                            | 1186                                                                                          |
| Crystal size [mm <sup>3</sup> ]                                 | 0.15×0.11×0.1                                                                   | 0.12×0.11×0.09                                                                 | 0.13×0.1×0.08                                                                                 |
| Crystal colour                                                  | clear greenish colourless                                                       | clear greenish colourless                                                      | clear greenish green                                                                          |
| Crystal shape                                                   | block                                                                           | block                                                                          | block                                                                                         |
| Radiation                                                       | MoK $\alpha$ ( $\lambda=0.71073$ Å)                                             | MoK $\alpha$ ( $\lambda=0.71073$ Å)                                            | MoK $\alpha$ ( $\lambda=0.71073$ Å)                                                           |
| 2 $\theta$ range [°]                                            | 4.81 to 55.05 (0.77 Å)                                                          | 4.63 to 55.00 (0.77 Å)                                                         | 4.32 to 53.20 (0.79 Å)                                                                        |
| Index ranges                                                    | -12 ≤ <i>h</i> ≤ 12<br>-15 ≤ <i>k</i> ≤ 15<br>-17 ≤ <i>l</i> ≤ 14               | -9 ≤ <i>h</i> ≤ 9<br>-10 ≤ <i>k</i> ≤ 10<br>-45 ≤ <i>l</i> ≤ 45                | -13 ≤ <i>h</i> ≤ 13<br>-19 ≤ <i>k</i> ≤ 19<br>-17 ≤ <i>l</i> ≤ 20                             |
| Reflections collected                                           | 27259                                                                           | 25127                                                                          | 39813                                                                                         |
| Independent reflections                                         | 6363<br><i>R</i> <sub>int</sub> = 0.0785<br><i>R</i> <sub>sigma</sub> = 0.0642  | 4541<br><i>R</i> <sub>int</sub> = 0.0887<br><i>R</i> <sub>sigma</sub> = 0.0692 | 10693<br><i>R</i> <sub>int</sub> = 0.1654<br><i>R</i> <sub>sigma</sub> = 0.1590               |
| Completeness to<br>$\theta = 25.242^\circ$                      | 99.7 %                                                                          | 100.0 %                                                                        | 99.7 %                                                                                        |
| Data / Restraints /<br>Parameters                               | 6363/0/477                                                                      | 4541/15/246                                                                    | 10693/367/721                                                                                 |
| Absorption correction                                           | 0.5397/0.7456                                                                   | 0.5397/0.7456                                                                  | 0.6624/0.7454                                                                                 |
| <i>T</i> <sub>min</sub> / <i>T</i> <sub>max</sub> (method)      | (multi-scan)                                                                    | (multi-scan)                                                                   | (multi-scan)                                                                                  |
| Goodness-of-fit on <i>F</i> <sup>2</sup>                        | 1.075                                                                           | 1.210                                                                          | 1.001                                                                                         |
| Final <i>R</i> indexes<br>[ <i>I</i> ≥ 2 $\sigma$ ( <i>I</i> )] | <i>R</i> <sub>1</sub> = 0.0434<br><i>wR</i> <sub>2</sub> = 0.0815               | <i>R</i> <sub>1</sub> = 0.0815<br><i>wR</i> <sub>2</sub> = 0.1742              | <i>R</i> <sub>1</sub> = 0.0689<br><i>wR</i> <sub>2</sub> = 0.1508                             |
| Final <i>R</i> indexes<br>[all data]                            | <i>R</i> <sub>1</sub> = 0.0600<br><i>wR</i> <sub>2</sub> = 0.0996               | <i>R</i> <sub>1</sub> = 0.0911<br><i>wR</i> <sub>2</sub> = 0.1806              | <i>R</i> <sub>1</sub> = 0.1753<br><i>wR</i> <sub>2</sub> = 0.2063                             |
| Largest peak/hole [eÅ <sup>-3</sup> ]                           | 0.46/-0.60                                                                      | 1.58/-1.18                                                                     | 0.62/-0.56                                                                                    |
| Flack X parameter                                               | ---                                                                             | 0.12(5)                                                                        | ---                                                                                           |
| Extinction coefficient                                          | ---                                                                             | ---                                                                            | ---                                                                                           |

Table 11.-1 Atomic coordinates and *U*<sub>eq</sub> [Å<sup>2</sup>] for C1

| Atom | <i>x</i>   | <i>y</i>    | <i>z</i>    | <i>U</i> <sub>eq</sub> |
|------|------------|-------------|-------------|------------------------|
| Ni1  | 0.47182(4) | 0.72784(3)  | 0.83948(2)  | 0.01626(10)            |
| Cl1  | 0.71311(8) | 0.74442(7)  | 0.28820(5)  | 0.02772(17)            |
| Cl2  | 0.68531(9) | 0.99019(6)  | 0.62109(5)  | 0.02716(17)            |
| O1   | 0.5791(2)  | 0.81129(16) | 0.73324(13) | 0.0190(4)              |

---

|             |           |             |             |           |
|-------------|-----------|-------------|-------------|-----------|
| <b>O2</b>   | 0.6832(2) | 0.63135(18) | 0.88378(16) | 0.0214(4) |
| <b>O3</b>   | 0.3641(2) | 0.62178(16) | 0.92913(13) | 0.0189(4) |
| <b>O4</b>   | 0.3076(2) | 0.45547(16) | 0.92512(14) | 0.0218(4) |
| <b>N1</b>   | 0.5013(2) | 0.59992(18) | 0.73850(16) | 0.0172(4) |
| <b>N2</b>   | 0.4126(2) | 0.85016(19) | 0.95655(16) | 0.0176(4) |
| <b>N3</b>   | 0.2653(2) | 0.85032(19) | 0.80211(16) | 0.0167(4) |
| <b>C1</b>   | 0.6044(3) | 0.7929(2)   | 0.63642(19) | 0.0174(5) |
| <b>C2</b>   | 0.6569(3) | 0.8722(2)   | 0.5677(2)   | 0.0196(5) |
| <b>C3</b>   | 0.6867(3) | 0.8604(3)   | 0.4637(2)   | 0.0223(6) |
| <b>C4</b>   | 0.6693(3) | 0.7642(2)   | 0.42010(19) | 0.0204(6) |
| <b>C5</b>   | 0.6207(3) | 0.6840(2)   | 0.4801(2)   | 0.0189(5) |
| <b>C6</b>   | 0.5867(3) | 0.6961(2)   | 0.58701(19) | 0.0174(5) |
| <b>C7</b>   | 0.5404(3) | 0.6036(2)   | 0.6421(2)   | 0.0180(5) |
| <b>C8</b>   | 0.3724(3) | 0.5262(2)   | 0.88776(19) | 0.0176(5) |
| <b>C12</b>  | 0.4712(3) | 0.4946(2)   | 0.7841(2)   | 0.0185(5) |
| <b>C13</b>  | 0.6221(3) | 0.3950(2)   | 0.8019(2)   | 0.0216(6) |
| <b>C14</b>  | 0.7254(3) | 0.3520(2)   | 0.7037(2)   | 0.0187(5) |
| <b>C15</b>  | 0.8441(3) | 0.3948(3)   | 0.6702(2)   | 0.0234(6) |
| <b>C16</b>  | 0.9367(3) | 0.3587(3)   | 0.5780(2)   | 0.0309(7) |
| <b>C17</b>  | 0.9103(4) | 0.2790(3)   | 0.5183(2)   | 0.0303(7) |
| <b>C18</b>  | 0.7923(3) | 0.2366(3)   | 0.5497(2)   | 0.0255(6) |
| <b>C19</b>  | 0.7001(3) | 0.2727(2)   | 0.6427(2)   | 0.0209(6) |
| <b>C20</b>  | 0.2027(3) | 0.8494(3)   | 0.7185(2)   | 0.0220(6) |
| <b>C21</b>  | 0.0784(3) | 0.9420(3)   | 0.6914(2)   | 0.0255(6) |
| <b>C22</b>  | 0.0164(3) | 1.0400(3)   | 0.7531(2)   | 0.0269(6) |
| <b>C23</b>  | 0.0791(3) | 1.0427(3)   | 0.8401(2)   | 0.0245(6) |
| <b>C24</b>  | 0.2040(3) | 0.9465(2)   | 0.8628(2)   | 0.0182(5) |
| <b>C25</b>  | 0.2821(3) | 0.9430(2)   | 0.95261(19) | 0.0179(5) |
| <b>C26</b>  | 0.2249(3) | 1.0292(3)   | 1.0280(2)   | 0.0232(6) |
| <b>C27</b>  | 0.3062(3) | 1.0201(3)   | 1.1090(2)   | 0.0234(6) |
| <b>C28</b>  | 0.4385(3) | 0.9251(3)   | 1.1135(2)   | 0.0237(6) |
| <b>C29</b>  | 0.4878(3) | 0.8423(2)   | 1.0359(2)   | 0.0202(5) |
| <b>H2A</b>  | 0.755(5)  | 0.664(4)    | 0.870(3)    | 0.061(13) |
| <b>H2B</b>  | 0.694(4)  | 0.594(3)    | 0.941(3)    | 0.051(12) |
| <b>H3</b>   | 0.717(3)  | 0.913(2)    | 0.4229(19)  | 0.006(6)  |
| <b>H5</b>   | 0.608(3)  | 0.618(3)    | 0.452(2)    | 0.016(7)  |
| <b>H7</b>   | 0.538(3)  | 0.537(3)    | 0.599(2)    | 0.020(7)  |
| <b>H12</b>  | 0.419(3)  | 0.461(2)    | 0.740(2)    | 0.015(7)  |
| <b>H13A</b> | 0.672(3)  | 0.424(2)    | 0.848(2)    | 0.014(7)  |
| <b>H13B</b> | 0.587(3)  | 0.332(3)    | 0.834(2)    | 0.025(8)  |
| <b>H15</b>  | 0.863(3)  | 0.446(2)    | 0.715(2)    | 0.011(7)  |
| <b>H16</b>  | 1.017(4)  | 0.388(3)    | 0.556(2)    | 0.027(8)  |
| <b>H17</b>  | 0.970(4)  | 0.259(3)    | 0.456(3)    | 0.040(10) |
| <b>H18</b>  | 0.771(4)  | 0.181(3)    | 0.507(3)    | 0.048(10) |
| <b>H19</b>  | 0.620(4)  | 0.244(3)    | 0.662(2)    | 0.032(9)  |
| <b>H20</b>  | 0.246(3)  | 0.783(3)    | 0.679(2)    | 0.024(8)  |
| <b>H21</b>  | 0.042(4)  | 0.935(3)    | 0.629(3)    | 0.034(9)  |
| <b>H22</b>  | -0.070(4) | 1.107(3)    | 0.737(2)    | 0.029(8)  |
| <b>H23</b>  | 0.041(3)  | 1.108(3)    | 0.885(2)    | 0.021(8)  |
| <b>H26</b>  | 0.132(4)  | 1.096(3)    | 1.024(2)    | 0.033(9)  |
| <b>H27</b>  | 0.274(3)  | 1.076(2)    | 1.159(2)    | 0.012(7)  |
| <b>H28</b>  | 0.495(3)  | 0.916(3)    | 1.167(2)    | 0.023(8)  |
| <b>H29</b>  | 0.577(3)  | 0.774(3)    | 1.037(2)    | 0.020(7)  |

---

$U_{eq}$  is defined as  $1/3$  of the trace of the orthogonalized  $U_{ij}$  tensor.

Table 1-12. Anisotropic displacement parameters [ $\text{\AA}^2$ ] for C1. The anisotropic displacement factor exponent takes the form:  $-2\pi^2 [ h^2(a^*)^2U_{11} + k^2(b^*)^2U_{22} + \dots + 2hka^*b^*U_{12} ]$

| Atom | $U_{11}$    | $U_{22}$    | $U_{33}$    | $U_{23}$    | $U_{13}$     | $U_{12}$     |
|------|-------------|-------------|-------------|-------------|--------------|--------------|
| Ni1  | 0.01802(18) | 0.01568(18) | 0.01435(17) | 0.00008(12) | -0.00183(12) | -0.00503(14) |
| Cl1  | 0.0330(4)   | 0.0344(4)   | 0.0153(3)   | 0.0017(3)   | 0.0001(3)    | -0.0127(3)   |
| Cl2  | 0.0380(4)   | 0.0248(4)   | 0.0244(3)   | 0.0005(3)   | -0.0044(3)   | -0.0179(3)   |
| O1   | 0.0251(10)  | 0.0197(9)   | 0.0140(9)   | 0.0008(7)   | -0.0012(7)   | -0.0106(8)   |
| O2   | 0.0191(10)  | 0.0227(10)  | 0.0216(10)  | 0.0039(8)   | -0.0037(8)   | -0.0062(8)   |
| O3   | 0.0221(10)  | 0.0181(9)   | 0.0168(9)   | -0.0011(7)  | 0.0009(7)    | -0.0085(8)   |
| O4   | 0.0263(10)  | 0.0231(10)  | 0.0182(9)   | 0.0015(8)   | -0.0004(8)   | -0.0127(8)   |
| N1   | 0.0176(11)  | 0.0134(11)  | 0.0176(11)  | 0.0002(8)   | -0.0025(8)   | -0.0015(9)   |
| N2   | 0.0207(11)  | 0.0162(11)  | 0.0159(11)  | -0.0008(8)  | -0.0035(8)   | -0.0058(9)   |
| N3   | 0.0156(11)  | 0.0167(11)  | 0.0168(11)  | -0.0024(8)  | -0.0019(8)   | -0.0039(9)   |
| C1   | 0.0179(13)  | 0.0165(13)  | 0.0180(13)  | 0.0015(10)  | -0.0040(10)  | -0.0057(10)  |
| C2   | 0.0224(14)  | 0.0157(13)  | 0.0211(13)  | 0.0018(10)  | -0.0037(10)  | -0.0073(11)  |
| C3   | 0.0227(14)  | 0.0251(15)  | 0.0185(13)  | 0.0065(11)  | -0.0010(11)  | -0.0094(12)  |
| C4   | 0.0202(14)  | 0.0254(14)  | 0.0129(12)  | -0.0005(10) | -0.0006(10)  | -0.0049(11)  |
| C5   | 0.0188(13)  | 0.0169(13)  | 0.0192(13)  | -0.0023(10) | -0.0033(10)  | -0.0032(11)  |
| C6   | 0.0169(13)  | 0.0190(13)  | 0.0167(13)  | 0.0038(10)  | -0.0050(10)  | -0.0063(11)  |
| C7   | 0.0174(13)  | 0.0169(13)  | 0.0191(13)  | -0.0005(10) | -0.0038(10)  | -0.0046(11)  |
| C8   | 0.0180(13)  | 0.0164(13)  | 0.0163(12)  | 0.0012(10)  | -0.0023(10)  | -0.0033(10)  |
| C12  | 0.0240(14)  | 0.0152(13)  | 0.0171(13)  | -0.0018(10) | 0.0011(10)   | -0.0089(11)  |
| C13  | 0.0275(15)  | 0.0157(13)  | 0.0199(14)  | 0.0019(11)  | -0.0028(11)  | -0.0057(12)  |
| C14  | 0.0181(13)  | 0.0134(12)  | 0.0211(13)  | 0.0010(10)  | -0.0046(10)  | -0.0004(10)  |
| C15  | 0.0215(14)  | 0.0258(15)  | 0.0240(15)  | -0.0004(12) | -0.0052(11)  | -0.0085(12)  |
| C16  | 0.0222(15)  | 0.0309(17)  | 0.0380(18)  | 0.0039(13)  | 0.0006(13)   | -0.0098(13)  |
| C17  | 0.0308(17)  | 0.0292(16)  | 0.0243(16)  | -0.0020(13) | 0.0030(13)   | -0.0043(13)  |
| C18  | 0.0317(16)  | 0.0242(15)  | 0.0202(14)  | 0.0002(11)  | -0.0033(12)  | -0.0093(13)  |
| C19  | 0.0187(14)  | 0.0167(13)  | 0.0245(14)  | 0.0017(11)  | -0.0036(11)  | -0.0028(11)  |
| C20  | 0.0213(14)  | 0.0201(14)  | 0.0219(14)  | -0.0026(11) | -0.0031(11)  | -0.0031(11)  |
| C21  | 0.0246(15)  | 0.0270(15)  | 0.0245(15)  | -0.0020(12) | -0.0076(12)  | -0.0062(12)  |
| C22  | 0.0253(15)  | 0.0217(15)  | 0.0292(16)  | 0.0010(12)  | -0.0107(12)  | 0.0004(12)   |
| C23  | 0.0252(15)  | 0.0205(14)  | 0.0256(15)  | -0.0036(12) | -0.0042(11)  | -0.0040(12)  |
| C24  | 0.0166(13)  | 0.0187(13)  | 0.0198(13)  | 0.0020(10)  | -0.0008(10)  | -0.0078(11)  |
| C25  | 0.0209(13)  | 0.0156(13)  | 0.0175(13)  | 0.0008(10)  | -0.0010(10)  | -0.0073(11)  |
| C26  | 0.0246(15)  | 0.0199(14)  | 0.0229(14)  | -0.0024(11) | -0.0025(11)  | -0.0046(12)  |
| C27  | 0.0335(16)  | 0.0206(14)  | 0.0168(13)  | -0.0042(11) | -0.0007(11)  | -0.0104(12)  |
| C28  | 0.0322(16)  | 0.0240(15)  | 0.0163(13)  | 0.0006(11)  | -0.0074(11)  | -0.0098(12)  |
| C29  | 0.0215(14)  | 0.0181(13)  | 0.0205(13)  | 0.0025(10)  | -0.0034(10)  | -0.0064(11)  |

Table1- 13. Bond lengths and angles for 1

| Atom-Atom | Length [ $\text{\AA}$ ] |        |          |
|-----------|-------------------------|--------|----------|
| Ni1-O1    | 2.0239(17)              | O3-C8  | 1.274(3) |
| Ni1-O2    | 2.084(2)                | O4-C8  | 1.246(3) |
| Ni1-O3    | 2.0966(17)              | N1-C7  | 1.277(3) |
| Ni1-N1    | 2.018(2)                | N1-C12 | 1.461(3) |
| Ni1-N2    | 2.081(2)                | N2-C25 | 1.350(3) |
| Ni1-N3    | 2.105(2)                | N2-C29 | 1.336(3) |
| Cl1-C4    | 1.746(3)                | N3-C20 | 1.335(3) |
| Cl2-C2    | 1.738(3)                | N3-C24 | 1.352(3) |
| O1-C1     | 1.288(3)                | C1-C2  | 1.434(3) |
| O2-H2A    | 0.89(4)                 | C1-C6  | 1.437(4) |
| O2-H2B    | 0.85(4)                 | C2-C3  | 1.370(4) |
|           |                         | C3-C4  | 1.391(4) |

|                       |                  |               |            |
|-----------------------|------------------|---------------|------------|
| C3–H3                 | 0.90(3)          | N2–Ni1–O2     | 94.02(8)   |
| C4–C5                 | 1.365(4)         | N2–Ni1–O3     | 91.01(8)   |
| C5–C6                 | 1.410(4)         | N2–Ni1–N3     | 78.37(8)   |
| C5–H5                 | 0.95(3)          | C1–O1–Ni1     | 125.70(16) |
| C6–C7                 | 1.445(3)         | Ni1–O2–H2A    | 117(3)     |
| C7–H7                 | 1.02(3)          | Ni1–O2–H2B    | 124(3)     |
| C8–C12                | 1.528(3)         | H2A–O2–H2B    | 108(4)     |
| C12–C13               | 1.550(4)         | C8–O3–Ni1     | 115.47(16) |
| C12–H12               | 1.00(3)          | C7–N1–Ni1     | 126.85(18) |
| C13–C14               | 1.505(4)         | C7–N1–C12     | 119.0(2)   |
| C13–H13A              | 0.98(3)          | C12–N1–Ni1    | 114.19(16) |
| C13–H13B              | 0.98(3)          | C25–N2–Ni1    | 115.69(17) |
| C14–C15               | 1.391(4)         | C29–N2–Ni1    | 126.18(18) |
| C14–C19               | 1.389(4)         | C29–N2–C25    | 118.1(2)   |
| C15–C16               | 1.389(4)         | C20–N3–Ni1    | 126.30(18) |
| C15–H15               | 0.96(3)          | C20–N3–C24    | 118.2(2)   |
| C16–C17               | 1.387(4)         | C24–N3–Ni1    | 114.83(17) |
| C16–H16               | 0.94(3)          | O1–C1–C2      | 120.0(2)   |
| C17–C18               | 1.378(4)         | O1–C1–C6      | 126.0(2)   |
| C17–H17               | 0.92(3)          | C2–C1–C6      | 114.1(2)   |
| C18–C19               | 1.395(4)         | C1–C2–Cl2     | 117.2(2)   |
| C18–H18               | 0.99(4)          | C3–C2–Cl2     | 118.4(2)   |
| C19–H19               | 0.93(3)          | C3–C2–C1      | 124.4(2)   |
| C20–C21               | 1.384(4)         | C2–C3–C4      | 119.1(2)   |
| C20–H20               | 0.91(3)          | C2–C3–H3      | 121.9(16)  |
| C21–C22               | 1.376(4)         | C4–C3–H3      | 119.0(16)  |
| C21–H21               | 0.96(3)          | C3–C4–Cl1     | 119.9(2)   |
| C22–C23               | 1.382(4)         | C5–C4–Cl1     | 119.7(2)   |
| C22–H22               | 0.97(3)          | C5–C4–C3      | 120.3(2)   |
| C23–C24               | 1.391(4)         | C4–C5–C6      | 121.3(2)   |
| C23–H23               | 0.95(3)          | C4–C5–H5      | 121.4(17)  |
| C24–C25               | 1.484(4)         | C6–C5–H5      | 117.2(17)  |
| C25–C26               | 1.393(4)         | C1–C6–C7      | 123.2(2)   |
| C26–C27               | 1.390(4)         | C5–C6–C1      | 120.8(2)   |
| C26–H26               | 0.96(3)          | C5–C6–C7      | 116.0(2)   |
| C27–C28               | 1.376(4)         | N1–C7–C6      | 125.5(2)   |
| C27–H27               | 0.91(3)          | N1–C7–H7      | 118.1(16)  |
| C28–C29               | 1.387(4)         | C6–C7–H7      | 116.3(16)  |
| C28–H28               | 0.93(3)          | O3–C8–C12     | 117.6(2)   |
| C29–H29               | 0.95(3)          | O4–C8–O3      | 125.5(2)   |
|                       |                  | O4–C8–C12     | 117.0(2)   |
| <b>Atom–Atom–Atom</b> | <b>Angle [°]</b> | N1–C12–C8     | 109.5(2)   |
| O1–Ni1–O2             | 88.18(8)         | N1–C12–C13    | 110.5(2)   |
| O1–Ni1–O3             | 170.15(7)        | N1–C12–H12    | 113.0(16)  |
| O1–Ni1–N2             | 98.72(8)         | C8–C12–C13    | 107.7(2)   |
| O1–Ni1–N3             | 87.29(8)         | C8–C12–H12    | 108.9(16)  |
| O2–Ni1–O3             | 92.68(8)         | C13–C12–H12   | 107.0(16)  |
| O2–Ni1–N3             | 170.44(8)        | C12–C13–H13A  | 109.1(16)  |
| O3–Ni1–N3             | 93.22(8)         | C12–C13–H13B  | 102.7(18)  |
| N1–Ni1–O1             | 90.29(8)         | C14–C13–C12   | 112.4(2)   |
| N1–Ni1–O2             | 89.55(8)         | C14–C13–H13A  | 111.4(16)  |
| N1–Ni1–O3             | 79.90(8)         | C14–C13–H13B  | 110.1(18)  |
| N1–Ni1–N2             | 170.40(9)        | H13A–C13–H13B | 111(2)     |
| N1–Ni1–N3             | 98.89(8)         | C15–C14–C13   | 120.6(2)   |

|             |           |             |           |
|-------------|-----------|-------------|-----------|
| C19–C14–C13 | 120.6(2)  | C21–C22–H22 | 122.0(19) |
| C19–C14–C15 | 118.8(2)  | C23–C22–H22 | 118.8(19) |
| C14–C15–H15 | 117.7(16) | C22–C23–C24 | 119.2(3)  |
| C16–C15–C14 | 120.9(3)  | C22–C23–H23 | 122.6(18) |
| C16–C15–H15 | 121.2(16) | C24–C23–H23 | 118.3(18) |
| C15–C16–H16 | 120.7(19) | N3–C24–C23  | 121.7(3)  |
| C17–C16–C15 | 119.5(3)  | N3–C24–C25  | 115.3(2)  |
| C17–C16–H16 | 119.7(19) | C23–C24–C25 | 123.0(2)  |
| C16–C17–H17 | 118(2)    | N2–C25–C24  | 115.5(2)  |
| C18–C17–C16 | 120.3(3)  | N2–C25–C26  | 122.1(2)  |
| C18–C17–H17 | 122(2)    | C26–C25–C24 | 122.4(2)  |
| C17–C18–C19 | 120.0(3)  | C25–C26–H26 | 121(2)    |
| C17–C18–H18 | 121(2)    | C27–C26–C25 | 118.8(3)  |
| C19–C18–H18 | 119(2)    | C27–C26–H26 | 120.0(19) |
| C14–C19–C18 | 120.5(3)  | C26–C27–H27 | 121.4(17) |
| C14–C19–H19 | 121(2)    | C28–C27–C26 | 119.1(3)  |
| C18–C19–H19 | 118(2)    | C28–C27–H27 | 119.5(17) |
| N3–C20–C21  | 123.1(3)  | C27–C28–C29 | 118.8(3)  |
| N3–C20–H20  | 116.1(19) | C27–C28–H28 | 120.9(18) |
| C21–C20–H20 | 120.7(19) | C29–C28–H28 | 120.3(18) |
| C20–C21–H21 | 118(2)    | N2–C29–C28  | 123.1(3)  |
| C22–C21–C20 | 118.6(3)  | N2–C29–H29  | 115.3(17) |
| C22–C21–H21 | 124(2)    | C28–C29–H29 | 121.5(17) |
| C21–C22–C23 | 119.2(3)  |             |           |

Table1- 14. Torsion angles for C1

| Atom–Atom–Atom–Atom | Torsion Angle [°] |                 |             |
|---------------------|-------------------|-----------------|-------------|
| Ni1–O1–C1–C2        | 168.86(18)        | N3–C20–C21–C22  | 0.2(4)      |
| Ni1–O1–C1–C6        | -11.9(4)          | N3–C24–C25–N2   | 6.3(3)      |
| Ni1–O3–C8–O4        | -174.8(2)         | N3–C24–C25–C26  | -173.5(2)   |
| Ni1–O3–C8–C12       | 5.8(3)            | C1–C2–C3–C4     | -1.6(4)     |
| Ni1–N1–C7–C6        | 6.8(4)            | C1–C6–C7–N1     | 4.4(4)      |
| Ni1–N1–C12–C8       | 20.1(3)           | C2–C1–C6–C5     | 0.4(4)      |
| Ni1–N1–C12–C13      | -98.4(2)          | C2–C1–C6–C7     | 177.7(2)    |
| Ni1–N2–C25–C24      | -2.5(3)           | C2–C3–C4–Cl1    | -177.8(2)   |
| Ni1–N2–C25–C26      | 177.3(2)          | C2–C3–C4–C5     | 1.1(4)      |
| Ni1–N2–C29–C28      | -177.4(2)         | C3–C4–C5–C6     | 0.1(4)      |
| Ni1–N3–C20–C21      | -170.2(2)         | C4–C5–C6–C1     | -0.9(4)     |
| Ni1–N3–C24–C23      | 171.4(2)          | C4–C5–C6–C7     | -178.3(2)   |
| Ni1–N3–C24–C25      | -6.9(3)           | C5–C6–C7–N1     | -178.2(2)   |
| Cl1–C4–C5–C6        | 179.0(2)          | C6–C1–C2–Cl2    | -178.70(19) |
| Cl2–C2–C3–C4        | 177.9(2)          | C6–C1–C2–C3     | 0.8(4)      |
| O1–C1–C2–Cl2        | 0.6(3)            | C7–N1–C12–C8    | -159.0(2)   |
| O1–C1–C2–C3         | -179.9(3)         | C7–N1–C12–C13   | 82.5(3)     |
| O1–C1–C6–C5         | -178.8(2)         | C8–C12–C13–C14  | 176.9(2)    |
| O1–C1–C6–C7         | -1.5(4)           | C12–N1–C7–C6    | -174.3(2)   |
| O3–C8–C12–N1        | -17.0(3)          | C12–C13–C14–C15 | 98.0(3)     |
| O3–C8–C12–C13       | 103.3(3)          | C12–C13–C14–C19 | -79.3(3)    |
| O4–C8–C12–N1        | 163.6(2)          | C13–C14–C15–C16 | -177.8(3)   |
| O4–C8–C12–C13       | -76.2(3)          | C13–C14–C19–C18 | 177.4(3)    |
| N1–C12–C13–C14      | -63.5(3)          | C14–C15–C16–C17 | 0.2(5)      |
| N2–C25–C26–C27      | 0.9(4)            | C15–C14–C19–C18 | 0.1(4)      |
|                     |                   | C15–C16–C17–C18 | 0.5(5)      |

---

|                        |           |
|------------------------|-----------|
| <b>C16-C17-C18-C19</b> | -0.8(5)   |
| <b>C17-C18-C19-C14</b> | 0.6(4)    |
| <b>C19-C14-C15-C16</b> | -0.5(4)   |
| <b>C20-N3-C24-C23</b>  | 0.1(4)    |
| <b>C20-N3-C24-C25</b>  | -178.3(2) |
| <b>C20-C21-C22-C23</b> | -0.4(4)   |
| <b>C21-C22-C23-C24</b> | 0.4(4)    |
| <b>C22-C23-C24-N3</b>  | -0.3(4)   |
| <b>C22-C23-C24-C25</b> | 177.9(3)  |
| <b>C23-C24-C25-N2</b>  | -172.0(2) |
| <b>C23-C24-C25-C26</b> | 8.2(4)    |
| <b>C24-N3-C20-C21</b>  | 0.0(4)    |
| <b>C24-C25-C26-C27</b> | -179.2(2) |
| <b>C25-N2-C29-C28</b>  | -0.4(4)   |
| <b>C25-C26-C27-C28</b> | -1.5(4)   |
| <b>C26-C27-C28-C29</b> | 1.1(4)    |
| <b>C27-C28-C29-N2</b>  | -0.1(4)   |
| <b>C29-N2-C25-C24</b>  | -179.9(2) |
| <b>C29-N2-C25-C26</b>  | 0.0(4)    |

---

Table 1-15. Atomic coordinates and  $U_{eq}$  [ $\text{\AA}^2$ ] for C2

| Atom | x           | y           | z           | $U_{eq}$   |
|------|-------------|-------------|-------------|------------|
| Ni1  | 0.67779(19) | 0.38841(17) | 0.69173(4)  | 0.0117(3)  |
| C1   | 1.1765(4)   | 0.7084(3)   | 0.62888(7)  | 0.0172(5)  |
| C12  | 0.7176(4)   | 0.8376(4)   | 0.51092(8)  | 0.0206(6)  |
| O1   | 0.8638(10)  | 0.5148(9)   | 0.65856(19) | 0.0117(15) |
| O2   | 0.5408(11)  | 0.6173(11)  | 0.7070(2)   | 0.0198(17) |
| H2B  | 0.539777    | 0.627406    | 0.731565    | 0.030      |
| H2A  | 0.422467    | 0.611546    | 0.700635    | 0.030      |
| O3   | 0.4698(10)  | 0.2562(10)  | 0.7203(2)   | 0.0136(15) |
| O4   | 0.1753(12)  | 0.1627(9)   | 0.71427(19) | 0.0167(15) |
| O5   | 0.8318(12)  | 0.1638(9)   | 0.6813(2)   | 0.0182(16) |
| H5   | 0.955(2)    | 0.165(4)    | 0.684(3)    | 0.027      |
| O6   | 0.8434(10)  | 0.3991(10)  | 0.74065(18) | 0.0150(15) |
| H6B  | 0.802883    | 0.480356    | 0.755322    | 0.022      |
| H6A  | 0.827133    | 0.307406    | 0.754062    | 0.022      |
| N1   | 0.4955(11)  | 0.3673(12)  | 0.6490(2)   | 0.0117(17) |
| C6   | 0.8250(10)  | 0.5761(8)   | 0.62339(15) | 0.017(2)   |
| C1   | 0.9621(8)   | 0.6802(9)   | 0.60763(18) | 0.017(2)   |
| C2   | 0.9303(8)   | 0.7578(8)   | 0.57279(18) | 0.014(2)   |
| H2   | 1.023953    | 0.828939    | 0.562019    | 0.017      |
| C3   | 0.7615(9)   | 0.7312(9)   | 0.55370(15) | 0.015(2)   |
| C4   | 0.6245(8)   | 0.6271(9)   | 0.56945(17) | 0.015(2)   |
| H4   | 0.509076    | 0.608954    | 0.556408    | 0.018      |
| C5   | 0.6562(9)   | 0.5495(8)   | 0.60430(17) | 0.016(2)   |
| C7   | 0.5015(15)  | 0.4404(12)  | 0.6170(3)   | 0.012(2)   |
| H7   | 0.399042    | 0.423285    | 0.600060    | 0.014      |
| C8   | 0.3226(16)  | 0.2737(12)  | 0.6588(3)   | 0.0114(18) |
| H8   | 0.211874    | 0.347873    | 0.653248    | 0.014      |
| C9   | 0.3195(16)  | 0.2284(12)  | 0.7010(3)   | 0.0111(18) |
| C10  | 0.2990(16)  | 0.1061(15)  | 0.6360(3)   | 0.019(2)   |
| H10A | 0.421570    | 0.046426    | 0.635449    | 0.023      |
| H10B | 0.208117    | 0.032716    | 0.649535    | 0.023      |
| C11  | 0.2320(14)  | 0.1306(14)  | 0.5959(3)   | 0.016(2)   |
| C12  | 0.3386(17)  | 0.0726(13)  | 0.5655(3)   | 0.017(2)   |
| H12  | 0.458483    | 0.023293    | 0.570072    | 0.020      |
| C13  | 0.2721(19)  | 0.0856(16)  | 0.5281(3)   | 0.025(3)   |
| H13  | 0.346737    | 0.044418    | 0.507718    | 0.031      |
| C14  | 0.0993(17)  | 0.1575(16)  | 0.5208(3)   | 0.023(3)   |
| H14  | 0.052985    | 0.166400    | 0.495555    | 0.027      |
| C15  | -0.0072(17) | 0.2180(15)  | 0.5519(4)   | 0.023(3)   |
| H15  | -0.124912   | 0.271203    | 0.547245    | 0.028      |
| C16  | 0.0538(16)  | 0.2021(14)  | 0.5885(3)   | 0.017(2)   |
| H16  | -0.023482   | 0.239122    | 0.608890    | 0.020      |
| C17  | 0.7722(19)  | -0.0102(17) | 0.6837(4)   | 0.033(3)   |
| H17A | 0.734071    | -0.049955   | 0.658530    | 0.049      |
| H17B | 0.665468    | -0.019129   | 0.701274    | 0.049      |
| H17C | 0.876681    | -0.079719   | 0.693093    | 0.049      |
| O7   | 1.1436(11)  | 0.6007(11)  | 0.7146(2)   | 0.0230(18) |
| H7A  | 1.079206    | 0.607400    | 0.693615    | 0.035      |
| H7B  | 1.099866    | 0.511090    | 0.725895    | 0.035      |

$U_{eq}$  is defined as 1/3 of the trace of the orthogonalized  $U_j$  tensor.

Table1- 16. Anisotropic displacement parameters [ $\text{\AA}^2$ ] for C2. The anisotropic displacement factor exponent takes the form:  $-2\pi^2[ h^2(a^*)^2U_{11} + k^2(b^*)^2U_{22} + \dots + 2hka^*b^*U_{12} ]$

| Atom | $U_{11}$   | $U_{22}$   | $U_{33}$   | $U_{23}$   | $U_{13}$    | $U_{12}$    |
|------|------------|------------|------------|------------|-------------|-------------|
| Ni1  | 0.0092(6)  | 0.0113(6)  | 0.0145(6)  | 0.0007(5)  | 0.0005(5)   | -0.0009(6)  |
| Cl1  | 0.0116(11) | 0.0134(11) | 0.0265(13) | 0.0027(10) | -0.0010(11) | -0.0033(11) |
| Cl2  | 0.0176(13) | 0.0228(14) | 0.0215(12) | 0.0071(11) | 0.0005(10)  | -0.0022(11) |
| O1   | 0.008(4)   | 0.018(4)   | 0.010(3)   | 0.003(3)   | 0.003(3)    | -0.001(3)   |
| O2   | 0.022(4)   | 0.017(4)   | 0.020(4)   | -0.001(4)  | 0.007(3)    | 0.005(4)    |
| O3   | 0.011(4)   | 0.016(4)   | 0.013(3)   | 0.003(3)   | 0.000(3)    | -0.007(3)   |
| O4   | 0.015(3)   | 0.017(4)   | 0.018(3)   | 0.005(3)   | 0.001(3)    | -0.001(4)   |
| O5   | 0.015(4)   | 0.010(3)   | 0.030(4)   | 0.000(3)   | 0.003(3)    | -0.002(4)   |
| O6   | 0.011(3)   | 0.019(4)   | 0.015(3)   | 0.000(3)   | 0.001(3)    | 0.002(3)    |
| N1   | 0.006(4)   | 0.014(4)   | 0.015(4)   | 0.002(4)   | 0.000(3)    | 0.001(4)    |
| C6   | 0.020(5)   | 0.009(5)   | 0.021(5)   | 0.002(4)   | 0.000(5)    | 0.004(5)    |
| C1   | 0.016(5)   | 0.012(5)   | 0.024(6)   | -0.003(5)  | 0.004(4)    | 0.003(4)    |
| C2   | 0.015(5)   | 0.009(5)   | 0.018(5)   | 0.001(4)   | 0.006(4)    | 0.004(4)    |
| C3   | 0.013(5)   | 0.017(5)   | 0.014(5)   | 0.002(4)   | 0.003(4)    | -0.002(4)   |
| C4   | 0.013(5)   | 0.017(6)   | 0.015(5)   | -0.003(4)  | 0.002(4)    | 0.009(4)    |
| C5   | 0.016(5)   | 0.016(5)   | 0.015(5)   | 0.000(4)   | 0.002(4)    | -0.007(4)   |
| C7   | 0.014(5)   | 0.009(5)   | 0.012(5)   | -0.002(4)  | 0.002(4)    | 0.005(4)    |
| C8   | 0.012(2)   | 0.011(2)   | 0.012(2)   | 0.0002(13) | 0.0003(13)  | -0.0006(13) |
| C9   | 0.011(4)   | 0.008(4)   | 0.014(4)   | -0.002(3)  | -0.001(4)   | 0.000(4)    |
| C10  | 0.019(5)   | 0.023(5)   | 0.015(5)   | -0.002(5)  | -0.001(4)   | -0.005(6)   |
| C11  | 0.016(5)   | 0.010(5)   | 0.021(5)   | -0.002(4)  | 0.000(4)    | -0.006(4)   |
| C12  | 0.013(5)   | 0.015(6)   | 0.022(5)   | 0.001(4)   | 0.003(4)    | 0.006(5)    |
| C13  | 0.039(8)   | 0.022(7)   | 0.015(5)   | -0.002(5)  | 0.005(5)    | -0.003(6)   |
| C14  | 0.027(6)   | 0.032(7)   | 0.008(5)   | -0.001(5)  | -0.006(4)   | 0.000(5)    |
| C15  | 0.014(6)   | 0.020(6)   | 0.036(7)   | 0.007(5)   | -0.004(5)   | 0.008(5)    |
| C16  | 0.020(6)   | 0.015(5)   | 0.015(5)   | -0.003(4)  | 0.000(4)    | -0.003(5)   |
| C17  | 0.033(4)   | 0.031(4)   | 0.035(4)   | -0.001(2)  | -0.001(2)   | -0.001(3)   |
| O7   | 0.019(4)   | 0.016(4)   | 0.034(4)   | 0.000(4)   | -0.004(3)   | -0.003(4)   |

Table1- 17. Bond lengths and angles for C2

| Atom-Atom | Length [ $\text{\AA}$ ] |          |           |
|-----------|-------------------------|----------|-----------|
| Ni1-O1    | 2.026(7)                | C6-C1    | 1.3900    |
| Ni1-O2    | 2.123(8)                | C6-C5    | 1.3900    |
| Ni1-O3    | 2.070(7)                | C1-C2    | 1.3900    |
| Ni1-O5    | 2.118(7)                | C2-H2    | 0.9500    |
| Ni1-O6    | 2.087(7)                | C2-C3    | 1.3900    |
| Ni1-N1    | 1.990(8)                | C3-C4    | 1.3900    |
| Cl1-C1    | 1.711(6)                | C4-H4    | 0.9500    |
| Cl2-C3    | 1.753(5)                | C4-C5    | 1.3900    |
| O1-C6     | 1.358(8)                | C5-C7    | 1.466(11) |
| O2-H2B    | 0.8701                  | C7-H7    | 0.9500    |
| O2-H2A    | 0.8706                  | C8-H8    | 1.0000    |
| O3-C9     | 1.285(13)               | C8-C9    | 1.529(13) |
| O4-C9     | 1.240(13)               | C8-C10   | 1.557(14) |
| O5-H5     | 0.878(13)               | C10-H10A | 0.9900    |
| O5-C17    | 1.441(15)               | C10-H10B | 0.9900    |
| O6-H6B    | 0.8730                  | C10-C11  | 1.503(14) |
| O6-H6A    | 0.8729                  | C11-C12  | 1.390(14) |
| N1-C7     | 1.269(13)               | C11-C16  | 1.410(15) |
| N1-C8     | 1.474(13)               | C12-H12  | 0.9500    |
|           |                         | C12-C13  | 1.401(15) |

---

|          |           |
|----------|-----------|
| C13-H13  | 0.9500    |
| C13-C14  | 1.377(17) |
| C14-H14  | 0.9500    |
| C14-C15  | 1.416(17) |
| C15-H15  | 0.9500    |
| C15-C16  | 1.363(16) |
| C16-H16  | 0.9500    |
| C17-H17A | 0.9800    |
| C17-H17B | 0.9800    |
| C17-H17C | 0.9800    |
| O7-H7A   | 0.8696    |
| O7-H7B   | 0.8702    |

| Atom-Atom-Atom | Angle [°] |
|----------------|-----------|
| O1-Ni1-O2      | 91.4(3)   |
| O1-Ni1-O3      | 173.7(3)  |
| O1-Ni1-O5      | 88.7(3)   |
| O1-Ni1-O6      | 95.1(3)   |
| O3-Ni1-O2      | 88.9(3)   |
| O3-Ni1-O5      | 91.7(3)   |
| O3-Ni1-O6      | 91.2(3)   |
| O5-Ni1-O2      | 174.3(3)  |
| O6-Ni1-O2      | 90.9(3)   |
| O6-Ni1-O5      | 83.5(3)   |
| N1-Ni1-O1      | 91.7(3)   |
| N1-Ni1-O2      | 88.0(3)   |
| N1-Ni1-O3      | 82.0(3)   |
| N1-Ni1-O5      | 97.7(3)   |
| N1-Ni1-O6      | 173.1(3)  |
| C6-O1-Ni1      | 124.7(5)  |
| Ni1-O2-H2B     | 109.5     |
| Ni1-O2-H2A     | 109.5     |
| H2B-O2-H2A     | 104.5     |
| C9-O3-Ni1      | 114.9(6)  |
| Ni1-O5-H5      | 119(2)    |
| C17-O5-Ni1     | 129.7(8)  |
| C17-O5-H5      | 107(2)    |
| Ni1-O6-H6B     | 109.4     |
| Ni1-O6-H6A     | 109.8     |
| H6B-O6-H6A     | 104.3     |
| C7-N1-Ni1      | 127.7(8)  |
| C7-N1-C8       | 117.6(9)  |
| C8-N1-Ni1      | 114.1(6)  |
| O1-C6-C1       | 115.7(5)  |
| O1-C6-C5       | 124.2(5)  |
| C1-C6-C5       | 120.0     |
| C6-C1-C11      | 121.7(4)  |
| C2-C1-C11      | 118.2(4)  |
| C2-C1-C6       | 120.0     |
| C1-C2-H2       | 120.0     |
| C1-C2-C3       | 120.0     |
| C3-C2-H2       | 120.0     |
| C2-C3-C12      | 119.8(4)  |
| C4-C3-C12      | 120.2(4)  |

---

---

|               |           |
|---------------|-----------|
| C4-C3-C2      | 120.0     |
| C3-C4-H4      | 120.0     |
| C3-C4-C5      | 120.0     |
| C5-C4-H4      | 120.0     |
| C6-C5-C7      | 126.0(6)  |
| C4-C5-C6      | 120.0     |
| C4-C5-C7      | 114.0(6)  |
| N1-C7-C5      | 124.3(9)  |
| N1-C7-H7      | 117.8     |
| C5-C7-H7      | 117.8     |
| N1-C8-H8      | 108.4     |
| N1-C8-C9      | 110.8(8)  |
| N1-C8-C10     | 113.4(8)  |
| C9-C8-H8      | 108.4     |
| C9-C8-C10     | 107.4(8)  |
| C10-C8-H8     | 108.4     |
| O3-C9-C8      | 117.6(9)  |
| O4-C9-O3      | 123.9(9)  |
| O4-C9-C8      | 118.5(9)  |
| C8-C10-H10A   | 108.7     |
| C8-C10-H10B   | 108.7     |
| H10A-C10-H10B | 107.6     |
| C11-C10-C8    | 114.1(9)  |
| C11-C10-H10A  | 108.7     |
| C11-C10-H10B  | 108.7     |
| C12-C11-C10   | 120.6(10) |
| C12-C11-C16   | 118.6(10) |
| C16-C11-C10   | 120.6(10) |
| C11-C12-H12   | 119.5     |
| C11-C12-C13   | 121.1(11) |
| C13-C12-H12   | 119.5     |
| C12-C13-H13   | 119.8     |
| C14-C13-C12   | 120.4(11) |
| C14-C13-H13   | 119.8     |
| C13-C14-H14   | 121.0     |
| C13-C14-C15   | 118.1(10) |
| C15-C14-H14   | 121.0     |
| C14-C15-H15   | 119.0     |
| C16-C15-C14   | 122.0(11) |
| C16-C15-H15   | 119.0     |
| C11-C16-H16   | 120.1     |
| C15-C16-C11   | 119.8(11) |
| C15-C16-H16   | 120.1     |
| O5-C17-H17A   | 109.5     |
| O5-C17-H17B   | 109.5     |
| O5-C17-H17C   | 109.5     |
| H17A-C17-H17B | 109.5     |
| H17A-C17-H17C | 109.5     |
| H17B-C17-H17C | 109.5     |
| H7A-O7-H7B    | 104.5     |

---

Table1- 8 Torsion angles for C2

| Atom-Atom-Atom-Atom | Torsion Angle [°] |
|---------------------|-------------------|
| Ni1-O1-C6-C1        | 170.8(4)          |
| Ni1-O1-C6-C5        | -4.9(9)           |
| Ni1-O3-C9-O4        | -174.3(8)         |
| Ni1-O3-C9-C8        | 8.0(11)           |
| Ni1-N1-C7-C5        | 4.2(15)           |
| Ni1-N1-C8-C9        | 4.9(10)           |
| Ni1-N1-C8-C10       | -116.0(8)         |
| Cl1-C1-C2-C3        | 176.8(5)          |
| Cl2-C3-C4-C5        | -176.9(6)         |
| O1-C6-C1-Cl1        | 7.4(6)            |
| O1-C6-C1-C2         | -175.9(7)         |
| O1-C6-C5-C4         | 175.6(8)          |
| O1-C6-C5-C7         | -6.0(9)           |
| N1-C8-C9-O3         | -8.6(12)          |
| N1-C8-C9-O4         | 173.6(9)          |
| N1-C8-C10-C11       | -77.5(11)         |
| C6-C1-C2-C3         | 0.0               |
| C6-C5-C7-N1         | 6.7(13)           |
| C1-C6-C5-C4         | 0.0               |
| C1-C6-C5-C7         | 178.5(8)          |
| C1-C2-C3-Cl2        | 176.9(6)          |
| C1-C2-C3-C4         | 0.0               |
| C2-C3-C4-C5         | 0.0               |
| C3-C4-C5-C6         | 0.0               |
| C3-C4-C5-C7         | -178.6(7)         |
| C4-C5-C7-N1         | -174.8(8)         |
| C5-C6-C1-Cl1        | -176.7(6)         |
| C5-C6-C1-C2         | 0.0               |
| C7-N1-C8-C9         | -167.1(9)         |
| C7-N1-C8-C10        | 72.0(12)          |
| C8-N1-C7-C5         | 174.9(8)          |
| C8-C10-C11-C12      | 121.6(11)         |
| C8-C10-C11-C16      | -62.9(13)         |
| C9-C8-C10-C11       | 159.7(9)          |
| C10-C8-C9-O3        | 115.8(10)         |
| C10-C8-C9-O4        | -62.0(12)         |
| C10-C11-C12-C13     | 176.1(11)         |
| C10-C11-C16-C15     | -177.7(11)        |
| C11-C12-C13-C14     | 0.4(18)           |
| C12-C11-C16-C15     | -2.2(16)          |
| C12-C13-C14-C15     | 0.3(18)           |
| C13-C14-C15-C16     | -2.0(19)          |
| C14-C15-C16-C11     | 3.0(18)           |
| C16-C11-C12-C13     | 0.5(16)           |

Table 1-9 Atomic coordinates and  $U_{eq}$  [Å<sup>2</sup>] for C3

| Atom | x           | y            | z            | $U_{eq}$   |
|------|-------------|--------------|--------------|------------|
| Ni2  | 0.73381(8)  | 0.37602(5)   | 0.14527(5)   | 0.0347(2)  |
| Ni1  | 0.25904(8)  | 0.60240(5)   | 0.31854(5)   | 0.0354(2)  |
| Cl4  | 0.93530(19) | 0.18776(13)  | -0.03497(11) | 0.0567(5)  |
| Cl1  | 0.1254(2)   | 0.79122(15)  | 0.50853(13)  | 0.0748(7)  |
| Cl2  | 0.0808(2)   | 1.09741(14)  | 0.22385(17)  | 0.0861(8)  |
| Cl3  | 0.8354(3)   | -0.12481(14) | 0.23056(18)  | 0.1198(13) |
| O3   | 0.3162(4)   | 0.5231(3)    | 0.2383(3)    | 0.0392(11) |
| O7   | 0.8030(4)   | 0.2823(3)    | 0.0850(3)    | 0.0402(11) |
| O6   | 0.6523(4)   | 0.4542(3)    | 0.2240(3)    | 0.0407(11) |
| O8   | 0.5729(4)   | 0.3950(3)    | 0.0856(3)    | 0.0463(12) |
| H8A  | 0.521902    | 0.435393     | 0.099980     | 0.069      |
| H8B  | 0.589739    | 0.418793     | 0.029898     | 0.069      |
| O4   | 0.3910(4)   | 0.5324(3)    | 0.1009(3)    | 0.0482(13) |
| O2   | 0.4415(4)   | 0.5951(3)    | 0.3427(3)    | 0.0526(13) |
| H2A  | 0.512969    | 0.566716     | 0.336862     | 0.079      |
| H2B  | 0.453120    | 0.652436     | 0.337472     | 0.079      |
| N1   | 0.2967(5)   | 0.7044(3)    | 0.2036(3)    | 0.0345(13) |
| O1   | 0.2123(4)   | 0.6968(3)    | 0.3807(3)    | 0.0447(12) |
| N5   | 0.7991(5)   | 0.5015(4)    | 0.0594(3)    | 0.0379(13) |
| O5   | 0.5852(5)   | 0.4366(3)    | 0.3637(3)    | 0.0563(14) |
| N4   | 0.6654(4)   | 0.2738(3)    | 0.2521(3)    | 0.0333(12) |
| N6   | 0.9026(5)   | 0.3723(3)    | 0.1885(3)    | 0.0365(13) |
| N2   | 0.0749(5)   | 0.5945(4)    | 0.3087(3)    | 0.0410(14) |
| N3   | 0.2169(6)   | 0.4842(4)    | 0.4252(3)    | 0.0436(15) |
| C48  | 0.9004(6)   | 0.5235(4)    | 0.0794(4)    | 0.0382(16) |
| C49  | 0.9429(7)   | 0.6109(5)    | 0.0383(4)    | 0.0498(19) |
| H49  | 1.014243    | 0.624417     | 0.052032     | 0.060      |
| C47  | 0.9620(6)   | 0.4490(4)    | 0.1497(4)    | 0.0362(16) |
| C21  | 0.0269(6)   | 0.5171(5)    | 0.3654(4)    | 0.0423(17) |
| C22  | 0.1061(7)   | 0.4539(4)    | 0.4297(4)    | 0.0445(18) |
| C9   | 0.3562(6)   | 0.5672(5)    | 0.1603(4)    | 0.0391(16) |
| C43  | 0.9542(6)   | 0.3019(5)    | 0.2523(4)    | 0.0427(17) |
| H43  | 0.913288    | 0.248659     | 0.279966     | 0.051      |
| C50  | 0.8754(8)   | 0.6776(5)    | -0.0240(4)   | 0.054(2)   |
| H50  | 0.900968    | 0.736817     | -0.052361    | 0.065      |
| C34  | 0.5911(6)   | 0.3075(4)    | 0.3200(4)    | 0.0388(16) |
| H34  | 0.613745    | 0.269265     | 0.378312     | 0.047      |
| C42  | 0.8060(6)   | 0.1929(4)    | 0.1199(4)    | 0.0371(16) |
| C10  | 0.2621(6)   | 0.7909(5)    | 0.1851(4)    | 0.0426(17) |
| H10  | 0.277021    | 0.829387     | 0.126681     | 0.051      |
| C36  | 0.6872(6)   | 0.1866(4)    | 0.2685(4)    | 0.0397(17) |
| H36  | 0.657707    | 0.147982     | 0.324393     | 0.048      |
| C52  | 0.7371(6)   | 0.5685(5)    | -0.0018(4)   | 0.0435(18) |
| H52  | 0.666753    | 0.554395     | -0.016497    | 0.052      |
| C35  | 0.6124(6)   | 0.4070(5)    | 0.3005(5)    | 0.0427(17) |
| C17  | 0.0055(7)   | 0.6549(5)    | 0.2491(4)    | 0.0450(18) |
| H17  | 0.038075    | 0.709006     | 0.210393     | 0.054      |
| C33  | 0.4527(6)   | 0.3050(5)    | 0.3184(5)    | 0.0560(19) |
| H33A | 0.406677    | 0.334165     | 0.358968     | 0.067      |
| H33B | 0.433446    | 0.342849     | 0.259775     | 0.067      |
| H33C | 0.404954    | 0.342751     | 0.350691     | 0.067      |
| H33D | 0.434908    | 0.331248     | 0.257877     | 0.067      |

---

|             |            |            |            |            |
|-------------|------------|------------|------------|------------|
| <b>C12</b>  | 0.1652(7)  | 0.9288(5)  | 0.2141(5)  | 0.0500(19) |
| <b>H12</b>  | 0.174153   | 0.958756   | 0.153268   | 0.060      |
| <b>C45</b>  | 1.1240(7)  | 0.3827(5)  | 0.2390(5)  | 0.0509(19) |
| <b>H45</b>  | 1.198041   | 0.387261   | 0.255965   | 0.061      |
| <b>C41</b>  | 0.8646(6)  | 0.1350(5)  | 0.0716(4)  | 0.0409(17) |
| <b>C19</b>  | -0.1596(7) | 0.5615(6)  | 0.2978(6)  | 0.061(2)   |
| <b>H19</b>  | -0.237329  | 0.549394   | 0.293136   | 0.073      |
| <b>C8</b>   | 0.3645(7)  | 0.6719(4)  | 0.1334(4)  | 0.0482(19) |
| <b>H8</b>   | 0.328569   | 0.704546   | 0.078500   | 0.058      |
| <b>C44</b>  | 1.0653(7)  | 0.3050(5)  | 0.2789(5)  | 0.0501(19) |
| <b>H44</b>  | 1.098530   | 0.254827   | 0.322908   | 0.060      |
| <b>C11</b>  | 0.2010(6)  | 0.8329(4)  | 0.2493(4)  | 0.0395(16) |
| <b>C23</b>  | 0.0729(9)  | 0.3706(5)  | 0.4917(5)  | 0.068(3)   |
| <b>H23</b>  | -0.004647  | 0.351914   | 0.496082   | 0.081      |
| <b>C51</b>  | 0.7734(7)  | 0.6554(5)  | -0.0426(5) | 0.052(2)   |
| <b>H51</b>  | 0.727320   | 0.699540   | -0.083561  | 0.063      |
| <b>C20</b>  | -0.0914(7) | 0.4992(5)  | 0.3609(5)  | 0.058(2)   |
| <b>H20</b>  | -0.124152  | 0.445536   | 0.400250   | 0.069      |
| <b>C46</b>  | 1.0737(7)  | 0.4549(5)  | 0.1734(5)  | 0.0492(19) |
| <b>H46</b>  | 1.114809   | 0.507903   | 0.144664   | 0.059      |
| <b>C40</b>  | 0.8736(7)  | 0.0400(5)  | 0.1038(5)  | 0.053(2)   |
| <b>H40</b>  | 0.913917   | 0.006108   | 0.068855   | 0.064      |
| <b>C38</b>  | 0.7638(7)  | 0.0453(5)  | 0.2396(5)  | 0.058(2)   |
| <b>H38</b>  | 0.730010   | 0.014082   | 0.297056   | 0.069      |
| <b>C24</b>  | 0.1554(10) | 0.3161(5)  | 0.5463(5)  | 0.075(3)   |
| <b>H24</b>  | 0.135427   | 0.258515   | 0.586312   | 0.090      |
| <b>C26</b>  | 0.2944(8)  | 0.4297(5)  | 0.4824(4)  | 0.058(2)   |
| <b>H26</b>  | 0.369819   | 0.450242   | 0.480751   | 0.070      |
| <b>C16</b>  | 0.1848(6)  | 0.7847(5)  | 0.3426(4)  | 0.0400(17) |
| <b>C37</b>  | 0.7533(6)  | 0.1428(4)  | 0.2079(4)  | 0.0435(18) |
| <b>C7</b>   | 0.5008(7)  | 0.6871(6)  | 0.1184(5)  | 0.069(2)   |
| <b>H7AA</b> | 0.548953   | 0.638547   | 0.099613   | 0.082      |
| <b>H7AB</b> | 0.526205   | 0.683435   | 0.173424   | 0.082      |
| <b>H7BC</b> | 0.533365   | 0.679737   | 0.062239   | 0.082      |
| <b>H7BD</b> | 0.538802   | 0.635346   | 0.163011   | 0.082      |
| <b>C30</b>  | 0.4075(19) | 0.2146(12) | 0.3404(15) | 0.073(3)   |
| <b>C29</b>  | 0.366(2)   | 0.1657(14) | 0.4277(14) | 0.086(3)   |
| <b>H29</b>  | 0.361316   | 0.192226   | 0.470806   | 0.103      |
| <b>C28</b>  | 0.330(2)   | 0.0770(14) | 0.4505(14) | 0.100(4)   |
| <b>H28</b>  | 0.301815   | 0.044181   | 0.508846   | 0.120      |
| <b>C27</b>  | 0.3362(19) | 0.0372(12) | 0.3860(18) | 0.105(4)   |
| <b>H27</b>  | 0.312384   | -0.022102  | 0.401275   | 0.126      |
| <b>C32</b>  | 0.378(2)   | 0.0862(14) | 0.2988(15) | 0.096(4)   |
| <b>H32</b>  | 0.382454   | 0.059661   | 0.255664   | 0.115      |
| <b>C31</b>  | 0.414(2)   | 0.1749(14) | 0.2760(12) | 0.085(4)   |
| <b>H31</b>  | 0.441956   | 0.207708   | 0.217622   | 0.102      |
| <b>C18</b>  | -0.1116(7) | 0.6402(6)  | 0.2431(5)  | 0.058(2)   |
| <b>H18</b>  | -0.157170  | 0.684128   | 0.201606   | 0.070      |
| <b>C13</b>  | 0.1176(7)  | 0.9776(5)  | 0.2684(5)  | 0.058(2)   |
| <b>C25</b>  | 0.2659(9)  | 0.3453(5)  | 0.5428(5)  | 0.068(3)   |
| <b>H25</b>  | 0.321616   | 0.308753   | 0.580679   | 0.082      |
| <b>C14</b>  | 0.1039(7)  | 0.9349(5)  | 0.3589(5)  | 0.057(2)   |
| <b>H14</b>  | 0.073182   | 0.969197   | 0.395391   | 0.069      |
| <b>C15</b>  | 0.1360(7)  | 0.8414(5)  | 0.3945(5)  | 0.051(2)   |

---

|      |            |            |            |          |
|------|------------|------------|------------|----------|
| C39  | 0.8217(9)  | -0.0043(5) | 0.1888(5)  | 0.071(3) |
| C3   | 0.5257(7)  | 0.7815(4)  | 0.0486(5)  | 0.066(2) |
| C2   | 0.4781(7)  | 0.8155(5)  | -0.0314(5) | 0.078(3) |
| H2   | 0.423668   | 0.782312   | -0.042851  | 0.094    |
| C1   | 0.5119(8)  | 0.8990(6)  | -0.0941(4) | 0.103(4) |
| H1   | 0.480049   | 0.921773   | -0.147649  | 0.124    |
| C6   | 0.5932(8)  | 0.9486(5)  | -0.0770(6) | 0.110(3) |
| H6   | 0.615811   | 1.004510   | -0.118977  | 0.132    |
| C5   | 0.6408(9)  | 0.9146(6)  | 0.0030(6)  | 0.109(3) |
| H5   | 0.695193   | 0.947788   | 0.014494   | 0.130    |
| C4   | 0.6070(8)  | 0.8311(6)  | 0.0658(5)  | 0.091(3) |
| H4   | 0.638814   | 0.808327   | 0.119294   | 0.109    |
| C3A  | 0.553(2)   | 0.7757(12) | 0.1174(18) | 0.081(4) |
| C2A  | 0.581(3)   | 0.8362(19) | 0.0318(15) | 0.093(3) |
| H2AA | 0.576193   | 0.818150   | -0.015785  | 0.111    |
| C1A  | 0.614(3)   | 0.9237(17) | 0.0174(14) | 0.105(4) |
| H1A  | 0.632757   | 0.964193   | -0.039826  | 0.126    |
| C6A  | 0.621(2)   | 0.9507(12) | 0.089(2)   | 0.107(5) |
| H6A  | 0.643596   | 1.009217   | 0.078998   | 0.128    |
| C5A  | 0.594(2)   | 0.8901(17) | 0.1742(16) | 0.107(6) |
| H5A  | 0.597870   | 0.908197   | 0.221863   | 0.128    |
| C4A  | 0.560(2)   | 0.8026(14) | 0.1886(13) | 0.097(5) |
| H4A  | 0.541305   | 0.762153   | 0.245906   | 0.117    |
| C30A | 0.4147(12) | 0.2076(8)  | 0.3585(10) | 0.071(3) |
| C29A | 0.4137(15) | 0.1600(9)  | 0.4484(10) | 0.089(3) |
| H29A | 0.435702   | 0.188373   | 0.484203   | 0.106    |
| C28A | 0.3797(16) | 0.0699(9)  | 0.4849(9)  | 0.104(4) |
| H28A | 0.379027   | 0.037997   | 0.545091   | 0.125    |
| C27A | 0.3468(13) | 0.0274(7)  | 0.4315(12) | 0.106(4) |
| H27A | 0.324039   | -0.032843  | 0.455876   | 0.127    |
| C32A | 0.3478(13) | 0.0751(9)  | 0.3415(12) | 0.099(3) |
| H32A | 0.325727   | 0.046691   | 0.305772   | 0.118    |
| C31A | 0.3817(13) | 0.1652(9)  | 0.3051(10) | 0.084(3) |
| H31A | 0.382401   | 0.197067   | 0.244882   | 0.100    |
| O9   | 0.4299(6)  | 0.6765(4)  | 0.4644(4)  | 0.093(2) |
| H9A  | 0.416317   | 0.633883   | 0.514013   | 0.140    |
| H9B  | 0.360967   | 0.690553   | 0.444583   | 0.140    |

$U_{eq}$  is defined as 1/3 of the trace of the orthogonalized  $U_{ij}$  tensor.

Table 1-10 Anisotropic displacement parameters [ $\text{\AA}^2$ ] for C3. The anisotropic displacement factor exponent takes the form:  $-2\pi^2 [ h^2(a^*)^2U_{11} + k^2(b^*)^2U_{22} + \dots + 2hka^*b^*U_{12} ]$

| Atom | $U_{11}$   | $U_{22}$   | $U_{33}$   | $U_{23}$    | $U_{13}$    | $U_{12}$    |
|------|------------|------------|------------|-------------|-------------|-------------|
| Ni2  | 0.0372(5)  | 0.0307(5)  | 0.0348(5)  | -0.0119(4)  | -0.0026(4)  | 0.0008(4)   |
| Ni1  | 0.0438(5)  | 0.0307(5)  | 0.0291(4)  | -0.0104(4)  | 0.0007(4)   | -0.0013(4)  |
| Cl4  | 0.0789(14) | 0.0498(11) | 0.0382(10) | -0.0172(8)  | 0.0029(9)   | -0.0023(10) |
| Cl1  | 0.1096(19) | 0.0677(14) | 0.0514(12) | -0.0337(11) | 0.0123(12)  | -0.0139(13) |
| Cl2  | 0.108(2)   | 0.0406(12) | 0.1111(19) | -0.0311(12) | -0.0368(15) | 0.0293(12)  |
| Cl3  | 0.199(3)   | 0.0308(12) | 0.0958(19) | -0.0157(12) | 0.048(2)    | 0.0005(15)  |
| O3   | 0.050(3)   | 0.033(3)   | 0.035(2)   | -0.013(2)   | 0.002(2)    | -0.008(2)   |
| O7   | 0.048(3)   | 0.030(3)   | 0.039(3)   | -0.011(2)   | 0.000(2)    | 0.000(2)    |
| O6   | 0.044(3)   | 0.034(3)   | 0.043(3)   | -0.016(2)   | 0.003(2)    | 0.000(2)    |
| O8   | 0.050(3)   | 0.048(3)   | 0.043(3)   | -0.019(2)   | -0.012(2)   | 0.007(2)    |
| O4   | 0.061(3)   | 0.053(3)   | 0.034(2)   | -0.025(2)   | -0.006(2)   | 0.010(2)    |

|     |          |          |          |           |           |           |
|-----|----------|----------|----------|-----------|-----------|-----------|
| O2  | 0.049(3) | 0.048(3) | 0.066(3) | -0.026(3) | -0.015(2) | 0.005(2)  |
| N1  | 0.035(3) | 0.033(3) | 0.034(3) | -0.014(2) | 0.004(2)  | -0.001(2) |
| O1  | 0.062(3) | 0.032(3) | 0.038(3) | -0.013(2) | -0.005(2) | 0.003(2)  |
| N5  | 0.036(3) | 0.037(3) | 0.038(3) | -0.012(3) | 0.002(2)  | -0.001(3) |
| O5  | 0.072(4) | 0.059(3) | 0.043(3) | -0.030(3) | -0.006(2) | 0.007(3)  |
| N4  | 0.031(3) | 0.036(3) | 0.034(3) | -0.017(2) | 0.001(2)  | 0.002(2)  |
| N6  | 0.038(3) | 0.030(3) | 0.038(3) | -0.012(2) | 0.000(2)  | 0.002(3)  |
| N2  | 0.047(4) | 0.041(3) | 0.034(3) | -0.015(3) | 0.005(3)  | -0.009(3) |
| N3  | 0.059(4) | 0.033(3) | 0.032(3) | -0.010(3) | -0.002(3) | 0.008(3)  |
| C48 | 0.038(4) | 0.037(4) | 0.040(4) | -0.018(3) | 0.005(3)  | -0.004(3) |
| C49 | 0.061(5) | 0.046(4) | 0.044(4) | -0.018(4) | 0.006(4)  | -0.016(4) |
| C47 | 0.044(4) | 0.036(4) | 0.031(3) | -0.018(3) | 0.008(3)  | -0.006(3) |
| C21 | 0.042(4) | 0.044(4) | 0.044(4) | -0.024(3) | 0.009(3)  | -0.008(3) |
| C22 | 0.066(5) | 0.034(4) | 0.030(4) | -0.014(3) | 0.009(3)  | -0.001(4) |
| C9  | 0.034(4) | 0.043(4) | 0.042(4) | -0.020(3) | -0.006(3) | 0.003(3)  |
| C43 | 0.045(5) | 0.037(4) | 0.043(4) | -0.011(3) | -0.005(3) | -0.001(3) |
| C50 | 0.095(7) | 0.030(4) | 0.033(4) | -0.008(3) | 0.002(4)  | -0.013(4) |
| C34 | 0.044(4) | 0.033(4) | 0.040(4) | -0.017(3) | -0.002(3) | 0.005(3)  |
| C42 | 0.030(4) | 0.040(4) | 0.042(4) | -0.017(3) | -0.005(3) | 0.004(3)  |
| C10 | 0.047(4) | 0.043(4) | 0.031(3) | -0.007(3) | -0.004(3) | 0.006(3)  |
| C36 | 0.042(4) | 0.038(4) | 0.037(4) | -0.015(3) | 0.003(3)  | -0.003(3) |
| C52 | 0.048(4) | 0.043(4) | 0.032(4) | -0.006(3) | -0.001(3) | -0.002(3) |
| C35 | 0.042(4) | 0.044(4) | 0.046(4) | -0.023(4) | -0.010(3) | 0.008(3)  |
| C17 | 0.047(5) | 0.045(4) | 0.039(4) | -0.015(3) | 0.000(3)  | -0.001(4) |
| C33 | 0.049(4) | 0.057(4) | 0.059(4) | -0.022(4) | 0.007(3)  | -0.006(3) |
| C12 | 0.059(5) | 0.034(4) | 0.057(5) | -0.018(4) | -0.007(4) | 0.002(4)  |
| C45 | 0.036(4) | 0.058(5) | 0.066(5) | -0.030(4) | -0.008(4) | -0.003(4) |
| C41 | 0.042(4) | 0.042(4) | 0.037(4) | -0.014(3) | -0.001(3) | -0.001(3) |
| C19 | 0.041(5) | 0.075(6) | 0.081(6) | -0.048(5) | -0.005(4) | -0.005(4) |
| C8  | 0.070(5) | 0.034(4) | 0.031(4) | -0.010(3) | 0.008(3)  | 0.004(4)  |
| C44 | 0.050(5) | 0.052(5) | 0.052(5) | -0.023(4) | -0.016(4) | 0.006(4)  |
| C11 | 0.037(4) | 0.039(4) | 0.041(4) | -0.015(3) | -0.001(3) | 0.001(3)  |
| C23 | 0.101(7) | 0.038(5) | 0.050(5) | -0.002(4) | 0.010(5)  | -0.017(5) |
| C51 | 0.063(6) | 0.043(5) | 0.047(4) | -0.013(4) | -0.005(4) | -0.003(4) |
| C20 | 0.056(5) | 0.048(5) | 0.072(6) | -0.031(4) | 0.023(4)  | -0.019(4) |
| C46 | 0.042(5) | 0.059(5) | 0.054(5) | -0.029(4) | 0.000(4)  | -0.009(4) |
| C40 | 0.076(6) | 0.034(4) | 0.049(4) | -0.018(3) | 0.006(4)  | -0.003(4) |
| C38 | 0.083(6) | 0.030(4) | 0.049(4) | -0.009(3) | 0.013(4)  | -0.008(4) |
| C24 | 0.120(9) | 0.033(5) | 0.049(5) | 0.003(4)  | 0.012(5)  | -0.011(5) |
| C26 | 0.071(6) | 0.056(5) | 0.033(4) | -0.009(4) | -0.001(4) | 0.018(4)  |
| C16 | 0.038(4) | 0.041(4) | 0.043(4) | -0.018(3) | -0.002(3) | -0.002(3) |
| C37 | 0.050(4) | 0.032(4) | 0.041(4) | -0.013(3) | 0.006(3)  | 0.008(3)  |
| C7  | 0.051(5) | 0.074(5) | 0.077(5) | -0.028(4) | 0.017(4)  | -0.019(4) |
| C30 | 0.063(5) | 0.070(5) | 0.076(6) | -0.010(5) | -0.004(5) | -0.021(5) |
| C29 | 0.080(6) | 0.078(5) | 0.086(7) | -0.003(5) | -0.009(5) | -0.030(5) |
| C28 | 0.099(6) | 0.086(6) | 0.097(7) | 0.002(6)  | -0.015(6) | -0.034(5) |
| C27 | 0.106(6) | 0.088(6) | 0.100(8) | 0.005(7)  | -0.018(7) | -0.039(6) |
| C32 | 0.093(7) | 0.087(6) | 0.095(8) | -0.005(7) | -0.016(6) | -0.038(6) |
| C31 | 0.076(6) | 0.079(6) | 0.089(7) | -0.005(6) | -0.012(6) | -0.033(5) |
| C18 | 0.056(6) | 0.065(6) | 0.062(5) | -0.033(4) | -0.007(4) | -0.003(4) |
| C13 | 0.064(6) | 0.038(4) | 0.073(6) | -0.020(4) | -0.017(4) | 0.003(4)  |
| C25 | 0.105(8) | 0.041(5) | 0.041(5) | -0.002(4) | -0.008(5) | 0.017(5)  |
| C14 | 0.053(5) | 0.055(5) | 0.074(6) | -0.039(4) | -0.005(4) | 0.005(4)  |
| C15 | 0.057(5) | 0.044(5) | 0.052(4) | -0.023(4) | 0.003(4)  | 0.004(4)  |

|      |          |          |           |           |           |           |
|------|----------|----------|-----------|-----------|-----------|-----------|
| C39  | 0.110(7) | 0.020(4) | 0.067(5)  | -0.011(4) | 0.016(5)  | -0.003(4) |
| C3   | 0.051(5) | 0.069(5) | 0.076(5)  | -0.026(4) | 0.012(4)  | -0.018(4) |
| C2   | 0.063(5) | 0.088(6) | 0.074(5)  | -0.016(5) | 0.007(5)  | -0.025(5) |
| C1   | 0.085(7) | 0.108(7) | 0.090(7)  | 0.002(6)  | 0.007(6)  | -0.040(6) |
| C6   | 0.093(6) | 0.103(6) | 0.114(6)  | -0.001(5) | -0.007(5) | -0.046(5) |
| C5   | 0.091(6) | 0.100(6) | 0.119(6)  | -0.009(5) | -0.006(5) | -0.041(5) |
| C4   | 0.076(5) | 0.085(5) | 0.106(5)  | -0.021(5) | -0.007(5) | -0.024(4) |
| C3A  | 0.063(6) | 0.080(6) | 0.094(6)  | -0.022(6) | 0.003(6)  | -0.022(5) |
| C2A  | 0.075(5) | 0.089(5) | 0.100(5)  | -0.014(5) | 0.000(5)  | -0.028(5) |
| C1A  | 0.088(6) | 0.097(6) | 0.116(6)  | -0.012(6) | -0.005(6) | -0.036(6) |
| C6A  | 0.088(8) | 0.098(8) | 0.121(8)  | -0.013(7) | -0.007(8) | -0.037(7) |
| C5A  | 0.087(9) | 0.094(9) | 0.124(10) | -0.014(9) | -0.007(9) | -0.027(9) |
| C4A  | 0.077(8) | 0.087(8) | 0.115(8)  | -0.016(7) | -0.006(7) | -0.022(7) |
| C30A | 0.060(5) | 0.070(5) | 0.074(6)  | -0.013(5) | -0.002(4) | -0.021(4) |
| C29A | 0.081(6) | 0.079(5) | 0.087(7)  | -0.002(5) | -0.003(5) | -0.027(5) |
| C28A | 0.104(7) | 0.091(6) | 0.094(7)  | 0.005(6)  | -0.013(6) | -0.028(6) |
| C27A | 0.111(6) | 0.086(6) | 0.101(8)  | 0.003(6)  | -0.016(6) | -0.034(6) |
| C32A | 0.095(6) | 0.086(5) | 0.096(7)  | 0.003(6)  | -0.010(5) | -0.044(5) |
| C31A | 0.075(5) | 0.075(5) | 0.087(7)  | -0.004(5) | -0.008(5) | -0.029(5) |
| O9   | 0.113(5) | 0.106(5) | 0.069(4)  | -0.043(4) | -0.037(4) | 0.030(4)  |

Table 1-11 Bond lengths and angles for C3

| Atom-Atom | Length [Å] |         |           |
|-----------|------------|---------|-----------|
| Ni2-O7    | 2.032(4)   | N4-C34  | 1.473(7)  |
| Ni2-O6    | 2.088(4)   | N4-C36  | 1.276(7)  |
| Ni2-O8    | 2.112(4)   | N6-C47  | 1.342(7)  |
| Ni2-N5    | 2.096(5)   | N6-C43  | 1.347(8)  |
| Ni2-N4    | 2.014(5)   | N2-C21  | 1.344(8)  |
| Ni2-N6    | 2.097(6)   | N2-C17  | 1.347(8)  |
| Ni1-O3    | 2.072(4)   | N3-C22  | 1.360(9)  |
| Ni1-O2    | 2.105(5)   | N3-C26  | 1.351(9)  |
| Ni1-N1    | 2.003(5)   | C48-C49 | 1.391(9)  |
| Ni1-O1    | 2.032(4)   | C48-C47 | 1.486(9)  |
| Ni1-N2    | 2.099(6)   | C49-H49 | 0.9300    |
| Ni1-N3    | 2.074(5)   | C49-C50 | 1.396(10) |
| Cl4-C41   | 1.739(6)   | C47-C46 | 1.384(9)  |
| Cl1-C15   | 1.737(7)   | C21-C22 | 1.471(10) |
| Cl2-C13   | 1.750(7)   | C21-C20 | 1.399(10) |
| Cl3-C39   | 1.739(7)   | C22-C23 | 1.380(9)  |
| O3-C9     | 1.252(7)   | C9-C8   | 1.537(9)  |
| O7-C42    | 1.295(7)   | C43-H43 | 0.9300    |
| O6-C35    | 1.243(7)   | C43-C44 | 1.387(9)  |
| O8-H8A    | 0.8510     | C50-H50 | 0.9300    |
| O8-H8B    | 0.8513     | C50-C51 | 1.342(10) |
| O4-C9     | 1.256(7)   | C34-H34 | 0.9800    |
| O2-H2A    | 0.8560     | C34-C35 | 1.507(9)  |
| O2-H2B    | 0.8898     | C34-C33 | 1.544(9)  |
| N1-C10    | 1.279(7)   | C42-C41 | 1.422(8)  |
| N1-C8     | 1.467(7)   | C42-C37 | 1.436(8)  |
| O1-C16    | 1.294(7)   | C10-H10 | 0.9300    |
| N5-C48    | 1.344(8)   | C10-C11 | 1.453(8)  |
| N5-C52    | 1.355(8)   | C36-H36 | 0.9300    |
| O5-C35    | 1.253(7)   | C36-C37 | 1.440(8)  |
|           |            | C52-H52 | 0.9300    |
|           |            | C52-C51 | 1.359(9)  |

---

|          |           |
|----------|-----------|
| C17-H17  | 0.9300    |
| C17-C18  | 1.376(10) |
| C33-H33A | 0.9700    |
| C33-H33B | 0.9700    |
| C33-H33C | 0.9700    |
| C33-H33D | 0.9700    |
| C33-C30  | 1.459(16) |
| C33-C30A | 1.507(12) |
| C12-H12  | 0.9300    |
| C12-C11  | 1.412(9)  |
| C12-C13  | 1.361(10) |
| C45-H45  | 0.9300    |
| C45-C44  | 1.351(9)  |
| C45-C46  | 1.370(10) |
| C41-C40  | 1.371(9)  |
| C19-H19  | 0.9300    |
| C19-C20  | 1.381(11) |
| C19-C18  | 1.349(10) |
| C8-H8    | 0.9800    |
| C8-C7    | 1.527(10) |
| C44-H44  | 0.9300    |
| C11-C16  | 1.432(8)  |
| C23-H23  | 0.9300    |
| C23-C24  | 1.365(12) |
| C51-H51  | 0.9300    |
| C20-H20  | 0.9300    |
| C46-H46  | 0.9300    |
| C40-H40  | 0.9300    |
| C40-C39  | 1.377(9)  |
| C38-H38  | 0.9300    |
| C38-C37  | 1.407(9)  |
| C38-C39  | 1.353(10) |
| C24-H24  | 0.9300    |
| C24-C25  | 1.352(12) |
| C26-H26  | 0.9300    |
| C26-C25  | 1.370(10) |
| C16-C15  | 1.425(9)  |
| C7-H7AA  | 0.9700    |
| C7-H7AB  | 0.9700    |
| C7-H7BC  | 0.9700    |
| C7-H7BD  | 0.9700    |
| C7-C3    | 1.529(9)  |
| C7-C3A   | 1.563(15) |
| C30-C29  | 1.3900    |
| C30-C31  | 1.3900    |
| C29-H29  | 0.9300    |
| C29-C28  | 1.3900    |
| C28-H28  | 0.9300    |
| C28-C27  | 1.3900    |
| C27-H27  | 0.9300    |
| C27-C32  | 1.3900    |
| C32-H32  | 0.9300    |
| C32-C31  | 1.3900    |
| C31-H31  | 0.9300    |

---

---

|                       |                  |
|-----------------------|------------------|
| C18-H18               | 0.9300           |
| C13-C14               | 1.381(10)        |
| C25-H25               | 0.9300           |
| C14-H14               | 0.9300           |
| C14-C15               | 1.373(9)         |
| C3-C2                 | 1.3900           |
| C3-C4                 | 1.3900           |
| C2-H2                 | 0.9300           |
| C2-C1                 | 1.3900           |
| C1-H1                 | 0.9300           |
| C1-C6                 | 1.3900           |
| C6-H6                 | 0.9300           |
| C6-C5                 | 1.3900           |
| C5-H5                 | 0.9300           |
| C5-C4                 | 1.3900           |
| C4-H4                 | 0.9300           |
| C3A-C2A               | 1.3900           |
| C3A-C4A               | 1.3900           |
| C2A-H2AA              | 0.9300           |
| C2A-C1A               | 1.3900           |
| C1A-H1A               | 0.9300           |
| C1A-C6A               | 1.3900           |
| C6A-H6A               | 0.9300           |
| C6A-C5A               | 1.3900           |
| C5A-H5A               | 0.9300           |
| C5A-C4A               | 1.3900           |
| C4A-H4A               | 0.9300           |
| C30A-C29A             | 1.3900           |
| C30A-C31A             | 1.3900           |
| C29A-H29A             | 0.9300           |
| C29A-C28A             | 1.3900           |
| C28A-H28A             | 0.9300           |
| C28A-C27A             | 1.3900           |
| C27A-H27A             | 0.9300           |
| C27A-C32A             | 1.3900           |
| C32A-H32A             | 0.9300           |
| C32A-C31A             | 1.3900           |
| C31A-H31A             | 0.9300           |
| O9-H9A                | 0.8498           |
| O9-H9B                | 0.8499           |
| <b>Atom-Atom-Atom</b> | <b>Angle [°]</b> |
| O7-Ni2-O6             | 170.84(17)       |
| O7-Ni2-O8             | 87.76(18)        |
| O7-Ni2-N5             | 104.83(18)       |
| O7-Ni2-N6             | 92.22(19)        |
| O6-Ni2-O8             | 92.43(18)        |
| O6-Ni2-N5             | 84.30(18)        |
| O6-Ni2-N6             | 88.87(18)        |
| N5-Ni2-O8             | 94.5(2)          |
| N5-Ni2-N6             | 77.7(2)          |
| N4-Ni2-O7             | 90.15(18)        |
| N4-Ni2-O6             | 80.68(18)        |
| N4-Ni2-O8             | 91.48(19)        |

---

---

|             |            |
|-------------|------------|
| N4-Ni2-N5   | 164.1(2)   |
| N4-Ni2-N6   | 96.6(2)    |
| N6-Ni2-O8   | 171.93(18) |
| O3-Ni1-O2   | 90.18(18)  |
| O3-Ni1-N2   | 89.95(19)  |
| O3-Ni1-N3   | 90.41(18)  |
| N1-Ni1-O3   | 80.99(18)  |
| N1-Ni1-O2   | 89.2(2)    |
| N1-Ni1-O1   | 90.23(19)  |
| N1-Ni1-N2   | 98.0(2)    |
| N1-Ni1-N3   | 170.7(2)   |
| O1-Ni1-O3   | 171.13(17) |
| O1-Ni1-O2   | 88.36(19)  |
| O1-Ni1-N2   | 92.6(2)    |
| O1-Ni1-N3   | 98.43(19)  |
| N2-Ni1-O2   | 172.72(19) |
| N3-Ni1-O2   | 94.4(2)    |
| N3-Ni1-N2   | 78.3(2)    |
| C9-O3-Ni1   | 115.3(4)   |
| C42-O7-Ni2  | 126.9(4)   |
| C35-O6-Ni2  | 114.1(4)   |
| Ni2-O8-H8A  | 109.5      |
| Ni2-O8-H8B  | 109.5      |
| H8A-O8-H8B  | 104.4      |
| Ni1-O2-H2A  | 142.6      |
| Ni1-O2-H2B  | 105.4      |
| H2A-O2-H2B  | 106.6      |
| C10-N1-Ni1  | 127.2(4)   |
| C10-N1-C8   | 118.8(5)   |
| C8-N1-Ni1   | 113.8(4)   |
| C16-O1-Ni1  | 125.5(4)   |
| C48-N5-Ni2  | 115.2(4)   |
| C48-N5-C52  | 117.5(6)   |
| C52-N5-Ni2  | 125.9(5)   |
| C34-N4-Ni2  | 113.4(4)   |
| C36-N4-Ni2  | 127.5(4)   |
| C36-N4-C34  | 118.9(5)   |
| C47-N6-Ni2  | 115.8(4)   |
| C47-N6-C43  | 117.8(6)   |
| C43-N6-Ni2  | 126.4(5)   |
| C21-N2-Ni1  | 114.5(5)   |
| C21-N2-C17  | 118.4(6)   |
| C17-N2-Ni1  | 126.9(5)   |
| C22-N3-Ni1  | 115.4(4)   |
| C26-N3-Ni1  | 126.0(5)   |
| C26-N3-C22  | 117.9(6)   |
| N5-C48-C49  | 122.0(6)   |
| N5-C48-C47  | 115.4(6)   |
| C49-C48-C47 | 122.5(7)   |
| C48-C49-H49 | 120.9      |
| C48-C49-C50 | 118.3(7)   |
| C50-C49-H49 | 120.9      |
| N6-C47-C48  | 114.9(6)   |
| N6-C47-C46  | 121.0(6)   |

---



---

|               |           |
|---------------|-----------|
| C46-C47-C48   | 124.1(6)  |
| N2-C21-C22    | 116.2(6)  |
| N2-C21-C20    | 120.4(7)  |
| C20-C21-C22   | 123.4(7)  |
| N3-C22-C21    | 114.7(6)  |
| N3-C22-C23    | 121.1(7)  |
| C23-C22-C21   | 124.1(8)  |
| O3-C9-O4      | 125.0(6)  |
| O3-C9-C8      | 118.6(6)  |
| O4-C9-C8      | 116.4(6)  |
| N6-C43-H43    | 118.4     |
| N6-C43-C44    | 123.3(6)  |
| C44-C43-H43   | 118.4     |
| C49-C50-H50   | 120.4     |
| C51-C50-C49   | 119.2(7)  |
| C51-C50-H50   | 120.4     |
| N4-C34-H34    | 109.9     |
| N4-C34-C35    | 109.4(5)  |
| N4-C34-C33    | 110.3(5)  |
| C35-C34-H34   | 109.9     |
| C35-C34-C33   | 107.3(5)  |
| C33-C34-H34   | 109.9     |
| O7-C42-C41    | 121.0(6)  |
| O7-C42-C37    | 125.2(6)  |
| C41-C42-C37   | 113.8(6)  |
| N1-C10-H10    | 117.8     |
| N1-C10-C11    | 124.4(6)  |
| C11-C10-H10   | 117.8     |
| N4-C36-H36    | 117.2     |
| N4-C36-C37    | 125.7(6)  |
| C37-C36-H36   | 117.2     |
| N5-C52-H52    | 118.7     |
| N5-C52-C51    | 122.7(7)  |
| C51-C52-H52   | 118.7     |
| O6-C35-O5     | 124.7(7)  |
| O6-C35-C34    | 119.0(6)  |
| O5-C35-C34    | 116.3(6)  |
| N2-C17-H17    | 118.6     |
| N2-C17-C18    | 122.8(7)  |
| C18-C17-H17   | 118.6     |
| C34-C33-H33A  | 107.9     |
| C34-C33-H33B  | 107.9     |
| C34-C33-H33C  | 109.2     |
| C34-C33-H33D  | 109.2     |
| H33A-C33-H33B | 107.2     |
| H33C-C33-H33D | 107.9     |
| C30-C33-C34   | 117.7(10) |
| C30-C33-H33A  | 107.9     |
| C30-C33-H33B  | 107.9     |
| C30A-C33-C34  | 111.9(8)  |
| C30A-C33-H33C | 109.2     |
| C30A-C33-H33D | 109.2     |
| C11-C12-H12   | 119.8     |
| C13-C12-H12   | 119.8     |

---

---

|             |          |
|-------------|----------|
| C13-C12-C11 | 120.5(7) |
| C44-C45-H45 | 120.2    |
| C44-C45-C46 | 119.5(7) |
| C46-C45-H45 | 120.2    |
| C42-C41-CI4 | 118.0(5) |
| C40-C41-CI4 | 117.1(5) |
| C40-C41-C42 | 124.9(6) |
| C20-C19-H19 | 120.5    |
| C18-C19-H19 | 120.5    |
| C18-C19-C20 | 119.0(8) |
| N1-C8-C9    | 109.2(5) |
| N1-C8-H8    | 109.6    |
| N1-C8-C7    | 111.7(6) |
| C9-C8-H8    | 109.6    |
| C7-C8-C9    | 107.3(6) |
| C7-C8-H8    | 109.6    |
| C43-C44-H44 | 120.9    |
| C45-C44-C43 | 118.2(7) |
| C45-C44-H44 | 120.9    |
| C12-C11-C10 | 115.1(6) |
| C12-C11-C16 | 120.7(6) |
| C16-C11-C10 | 124.1(6) |
| C22-C23-H23 | 120.4    |
| C24-C23-C22 | 119.1(9) |
| C24-C23-H23 | 120.4    |
| C50-C51-C52 | 120.2(7) |
| C50-C51-H51 | 119.9    |
| C52-C51-H51 | 119.9    |
| C21-C20-H20 | 120.0    |
| C19-C20-C21 | 119.9(7) |
| C19-C20-H20 | 120.0    |
| C47-C46-H46 | 119.9    |
| C45-C46-C47 | 120.2(7) |
| C45-C46-H46 | 119.9    |
| C41-C40-H40 | 120.6    |
| C41-C40-C39 | 118.8(6) |
| C39-C40-H40 | 120.6    |
| C37-C38-H38 | 119.1    |
| C39-C38-H38 | 119.1    |
| C39-C38-C37 | 121.8(6) |
| C23-C24-H24 | 119.8    |
| C25-C24-C23 | 120.4(8) |
| C25-C24-H24 | 119.8    |
| N3-C26-H26  | 118.8    |
| N3-C26-C25  | 122.4(8) |
| C25-C26-H26 | 118.8    |
| O1-C16-C11  | 125.1(6) |
| O1-C16-C15  | 119.9(6) |
| C15-C16-C11 | 115.0(6) |
| C42-C37-C36 | 123.8(6) |
| C38-C37-C42 | 120.4(6) |
| C38-C37-C36 | 115.8(6) |
| C8-C7-H7AA  | 109.4    |
| C8-C7-H7AB  | 109.4    |

---



---

|              |           |
|--------------|-----------|
| C8-C7-H7BC   | 106.0     |
| C8-C7-H7BD   | 106.0     |
| C8-C7-C3     | 111.2(7)  |
| C8-C7-C3A    | 125.3(11) |
| H7AA-C7-H7AB | 108.0     |
| H7BC-C7-H7BD | 106.3     |
| C3-C7-H7AA   | 109.4     |
| C3-C7-H7AB   | 109.4     |
| C3A-C7-H7BC  | 106.0     |
| C3A-C7-H7BD  | 106.0     |
| C29-C30-C33  | 119.4(14) |
| C29-C30-C31  | 120.0     |
| C31-C30-C33  | 120.4(14) |
| C30-C29-H29  | 120.0     |
| C28-C29-C30  | 120.0     |
| C28-C29-H29  | 120.0     |
| C29-C28-H28  | 120.0     |
| C29-C28-C27  | 120.0     |
| C27-C28-H28  | 120.0     |
| C28-C27-H27  | 120.0     |
| C32-C27-C28  | 120.0     |
| C32-C27-H27  | 120.0     |
| C27-C32-H32  | 120.0     |
| C27-C32-C31  | 120.0     |
| C31-C32-H32  | 120.0     |
| C30-C31-H31  | 120.0     |
| C32-C31-C30  | 120.0     |
| C32-C31-H31  | 120.0     |
| C17-C18-H18  | 120.3     |
| C19-C18-C17  | 119.4(8)  |
| C19-C18-H18  | 120.3     |
| C12-C13-CI2  | 119.9(6)  |
| C12-C13-C14  | 120.9(7)  |
| C14-C13-CI2  | 119.1(6)  |
| C24-C25-C26  | 118.9(8)  |
| C24-C25-H25  | 120.5     |
| C26-C25-H25  | 120.5     |
| C13-C14-H14  | 120.2     |
| C15-C14-C13  | 119.5(7)  |
| C15-C14-H14  | 120.2     |
| C16-C15-CI1  | 118.4(5)  |
| C14-C15-CI1  | 118.2(6)  |
| C14-C15-C16  | 123.3(7)  |
| C40-C39-CI3  | 118.9(6)  |
| C38-C39-CI3  | 120.7(6)  |
| C38-C39-C40  | 120.4(6)  |
| C2-C3-C7     | 123.4(7)  |
| C2-C3-C4     | 120.0     |
| C4-C3-C7     | 116.5(7)  |
| C3-C2-H2     | 120.0     |
| C1-C2-C3     | 120.0     |
| C1-C2-H2     | 120.0     |
| C2-C1-H1     | 120.0     |
| C2-C1-C6     | 120.0     |

---

---

|              |           |
|--------------|-----------|
| C6-C1-H1     | 120.0     |
| C1-C6-H6     | 120.0     |
| C5-C6-C1     | 120.0     |
| C5-C6-H6     | 120.0     |
| C6-C5-H5     | 120.0     |
| C6-C5-C4     | 120.0     |
| C4-C5-H5     | 120.0     |
| C3-C4-H4     | 120.0     |
| C5-C4-C3     | 120.0     |
| C5-C4-H4     | 120.0     |
| C2A-C3A-C7   | 111.4(17) |
| C2A-C3A-C4A  | 120.0     |
| C4A-C3A-C7   | 128.1(17) |
| C3A-C2A-H2AA | 120.0     |
| C3A-C2A-C1A  | 120.0     |
| C1A-C2A-H2AA | 120.0     |
| C2A-C1A-H1A  | 120.0     |
| C6A-C1A-C2A  | 120.0     |
| C6A-C1A-H1A  | 120.0     |
| C1A-C6A-H6A  | 120.0     |
| C5A-C6A-C1A  | 120.0     |
| C5A-C6A-H6A  | 120.0     |
| C6A-C5A-H5A  | 120.0     |
| C6A-C5A-C4A  | 120.0     |

---



---

|                |          |
|----------------|----------|
| C4A-C5A-H5A    | 120.0    |
| C3A-C4A-H4A    | 120.0    |
| C5A-C4A-C3A    | 120.0    |
| C5A-C4A-H4A    | 120.0    |
| C29A-C30A-C33  | 120.3(9) |
| C29A-C30A-C31A | 120.0    |
| C31A-C30A-C33  | 119.7(9) |
| C30A-C29A-H29A | 120.0    |
| C28A-C29A-C30A | 120.0    |
| C28A-C29A-H29A | 120.0    |
| C29A-C28A-H28A | 120.0    |
| C27A-C28A-C29A | 120.0    |
| C27A-C28A-H28A | 120.0    |
| C28A-C27A-H27A | 120.0    |
| C28A-C27A-C32A | 120.0    |
| C32A-C27A-H27A | 120.0    |
| C27A-C32A-H32A | 120.0    |
| C31A-C32A-C27A | 120.0    |
| C31A-C32A-H32A | 120.0    |
| C30A-C31A-H31A | 120.0    |
| C32A-C31A-C30A | 120.0    |
| C32A-C31A-H31A | 120.0    |
| H9A-O9-H9B     | 104.5    |

---



Table 1-12 Torsion angles for C3

| Atom-Atom-Atom-Atom | Torsion Angle [°] |
|---------------------|-------------------|
| Ni2-O7-C42-C41      | -175.8(5)         |
| Ni2-O7-C42-C37      | 4.0(10)           |
| Ni2-O6-C35-O5       | 163.5(5)          |
| Ni2-O6-C35-C34      | -18.1(8)          |
| Ni2-N5-C48-C49      | -168.9(5)         |
| Ni2-N5-C48-C47      | 9.7(7)            |
| Ni2-N5-C52-C51      | 166.1(5)          |
| Ni2-N4-C34-C35      | -13.9(6)          |
| Ni2-N4-C34-C33      | 103.9(5)          |
| Ni2-N4-C36-C37      | -8.7(10)          |
| Ni2-N6-C47-C48      | -2.2(6)           |
| Ni2-N6-C47-C46      | 179.5(5)          |
| Ni2-N6-C43-C44      | -178.6(5)         |
| Ni1-O3-C9-O4        | -177.4(5)         |
| Ni1-O3-C9-C8        | 2.8(8)            |
| Ni1-N1-C10-C11      | 8.5(10)           |
| Ni1-N1-C8-C9        | 15.8(7)           |
| Ni1-N1-C8-C7        | -102.6(6)         |
| Ni1-O1-C16-C11      | -10.4(10)         |
| Ni1-O1-C16-C15      | 170.7(5)          |
| Ni1-N2-C21-C22      | 4.6(7)            |
| Ni1-N2-C21-C20      | -174.5(5)         |
| Ni1-N2-C17-C18      | 174.5(5)          |
| Ni1-N3-C22-C21      | -8.3(7)           |
| Ni1-N3-C22-C23      | 172.8(5)          |
| Ni1-N3-C26-C25      | -169.7(5)         |
| Cl4-C41-C40-C39     | 178.2(7)          |
| Cl2-C13-C14-C15     | -178.1(6)         |
| O3-C9-C8-N1         | -12.3(9)          |
| O3-C9-C8-C7         | 108.9(7)          |
| O7-C42-C41-Cl4      | 1.4(9)            |
| O7-C42-C41-C40      | 179.1(7)          |
| O7-C42-C37-C36      | 1.5(11)           |
| O7-C42-C37-C38      | -179.0(7)         |
| O4-C9-C8-N1         | 167.9(6)          |
| O4-C9-C8-C7         | -70.9(8)          |
| N1-C10-C11-C12      | -177.0(7)         |
| N1-C10-C11-C16      | 7.6(11)           |
| N1-C8-C7-C3         | -90.7(7)          |
| N1-C8-C7-C3A        | -41.5(15)         |
| O1-C16-C15-Cl1      | 4.5(10)           |
| O1-C16-C15-C14      | -179.6(7)         |
| N5-C48-C49-C50      | 1.5(10)           |
| N5-C48-C47-N6       | -5.0(8)           |
| N5-C48-C47-C46      | 173.2(6)          |
| N5-C52-C51-C50      | 1.0(11)           |
| N4-C34-C35-O6       | 21.6(8)           |
| N4-C34-C35-O5       | -159.9(6)         |
| N4-C34-C33-C30      | 64.2(13)          |
| N4-C34-C33-C30A     | 74.9(9)           |
| N4-C36-C37-C42      | 1.0(12)           |
| N4-C36-C37-C38      | -178.6(7)         |
| N6-C47-C46-C45      | -1.8(10)          |
| N6-C43-C44-C45      | 0.5(10)           |
| N2-C21-C22-N3       | 2.4(8)            |
| N2-C21-C22-C23      | -178.7(6)         |

---

|                    |            |
|--------------------|------------|
| N2-C21-C20-C19     | -0.1(10)   |
| N2-C17-C18-C19     | -1.0(11)   |
| N3-C22-C23-C24     | -3.1(11)   |
| N3-C26-C25-C24     | -1.2(12)   |
| C48-N5-C52-C51     | 0.0(9)     |
| C48-C49-C50-C51    | -0.5(10)   |
| C48-C47-C46-C45    | -179.9(6)  |
| C49-C48-C47-N6     | 173.6(6)   |
| C49-C48-C47-C46    | -8.1(9)    |
| C49-C50-C51-C52    | -0.7(11)   |
| C47-N6-C43-C44     | -0.6(9)    |
| C47-C48-C49-C50    | -177.0(6)  |
| C21-N2-C17-C18     | -1.0(10)   |
| C21-C22-C23-C24    | 178.0(7)   |
| C22-N3-C26-C25     | 1.2(10)    |
| C22-C21-C20-C19    | -179.1(6)  |
| C22-C23-C24-C25    | 3.2(13)    |
| C9-C8-C7-C3        | 149.7(6)   |
| C9-C8-C7-C3A       | -161.0(14) |
| C43-N6-C47-C48     | 179.5(5)   |
| C43-N6-C47-C46     | 1.2(9)     |
| C34-N4-C36-C37     | 177.1(6)   |
| C34-C33-C30-C29    | 90.0(15)   |
| C34-C33-C30-C31    | -85.7(14)  |
| C34-C33-C30A-C29A  | 68.5(10)   |
| C34-C33-C30A-C31A  | -110.8(10) |
| C42-C41-C40-C39    | 0.6(12)    |
| C10-N1-C8-C9       | -160.2(6)  |
| C10-N1-C8-C7       | 81.4(8)    |
| C10-C11-C16-O1     | -6.3(11)   |
| C10-C11-C16-C15    | 172.7(7)   |
| C36-N4-C34-C35     | 161.1(6)   |
| C36-N4-C34-C33     | -81.1(7)   |
| C52-N5-C48-C49     | -1.2(9)    |
| C52-N5-C48-C47     | 177.4(5)   |
| C35-C34-C33-C30    | -176.6(12) |
| C35-C34-C33-C30A   | -166.0(8)  |
| C17-N2-C21-C22     | -179.4(6)  |
| C17-N2-C21-C20     | 1.5(9)     |
| C33-C34-C35-O6     | -98.1(7)   |
| C33-C34-C35-O5     | 80.4(7)    |
| C33-C30-C29-C28    | -175.8(18) |
| C33-C30-C31-C32    | 175.7(18)  |
| C33-C30A-C29A-C28A | -179.3(11) |
| C33-C30A-C31A-C32A | 179.3(11)  |
| C12-C11-C16-O1     | 178.5(7)   |
| C12-C11-C16-C15    | -2.5(10)   |
| C12-C13-C14-C15    | -1.5(12)   |
| C41-C42-C37-C36    | -178.7(7)  |
| C41-C42-C37-C38    | 0.9(10)    |
| C41-C40-C39-C13    | -178.8(6)  |
| C41-C40-C39-C38    | -0.4(14)   |
| C8-N1-C10-C11      | -176.1(6)  |
| C8-C7-C3-C2        | -46.0(9)   |
| C8-C7-C3-C4        | 138.4(6)   |
| C8-C7-C3A-C2A      | -97.7(15)  |
| C8-C7-C3A-C4A      | 74(2)      |
| C44-C45-C46-C47    | 1.7(10)    |
| C11-C12-C13-C12    | 176.8(6)   |

---

---

|                 |           |
|-----------------|-----------|
| C11-C12-C13-C14 | 0.3(12)   |
| C11-C16-C15-C1  | -174.5(5) |
| C11-C16-C15-C14 | 1.3(11)   |
| C23-C24-C25-C26 | -1.1(13)  |
| C20-C21-C22-N3  | -178.6(6) |
| C20-C21-C22-C23 | 0.3(10)   |
| C20-C19-C18-C17 | 2.4(11)   |
| C46-C45-C44-C43 | -1.0(10)  |
| C26-N3-C22-C21  | 179.9(5)  |
| C26-N3-C22-C23  | 0.9(9)    |
| C37-C42-C41-C14 | -178.4(5) |
| C37-C42-C41-C40 | -0.8(10)  |
| C37-C38-C39-C13 | 178.9(7)  |
| C37-C38-C39-C40 | 0.6(14)   |
| C7-C3-C2-C1     | -175.4(7) |
| C7-C3-C4-C5     | 175.7(7)  |
| C7-C3A-C2A-C1A  | 172.4(19) |
| C7-C3A-C4A-C5A  | -171(2)   |
| C30-C29-C28-C27 | 0.0       |
| C29-C30-C31-C32 | 0.0       |
| C29-C28-C27-C32 | 0.0       |
| C28-C27-C32-C31 | 0.0       |
| C27-C32-C31-C30 | 0.0       |
| C31-C30-C29-C28 | 0.0       |
| C18-C19-C20-C21 | -1.9(11)  |
| C13-C12-C11-C10 | -173.8(7) |
| C13-C12-C11-C16 | 1.8(11)   |
| C13-C14-C15-C1  | 176.5(6)  |
| C13-C14-C15-C16 | 0.7(12)   |
| C39-C38-C37-C42 | -0.8(13)  |
| C39-C38-C37-C36 | 178.8(8)  |
| C3-C2-C1-C6     | 0.0       |
| C2-C3-C4-C5     | 0.0       |
| C2-C1-C6-C5     | 0.0       |
| C1-C6-C5-C4     | 0.0       |
| C6-C5-C4-C3     | 0.0       |
| C4-C3-C2-C1     | 0.0       |
| C3A-C2A-C1A-C6A | 0.0       |
| C2A-C3A-C4A-C5A | 0.0       |
| C2A-C1A-C6A-C5A | 0.0       |

---

2. UV of C1, C2 and C3

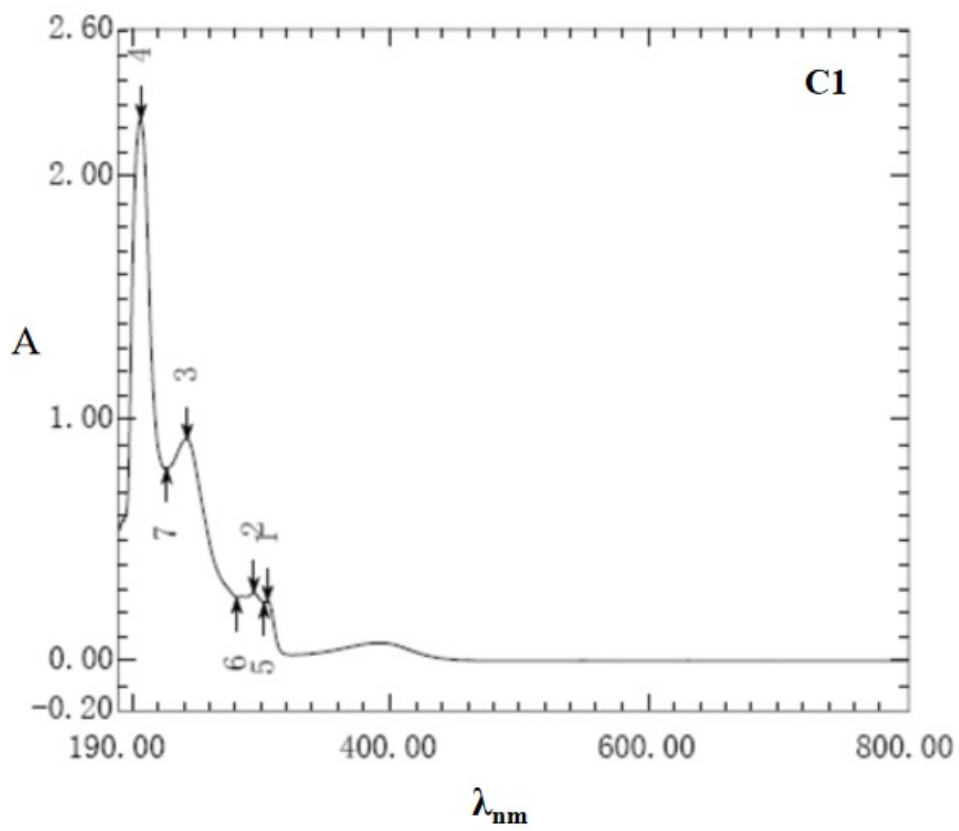

| No | P/V | $\lambda_{nm}$ | A      |
|----|-----|----------------|--------|
| 1  | ↑   | 305.2          | 0.2485 |
| 2  | ↑   | 294.5          | 0.2815 |
| 3  | ↑   | 242.4          | 0.9151 |
| 4  | ↑   | 206.9          | 2.2311 |
| 5  | ↓   | 302.4          | 0.2435 |
| 6  | ↓   | 281.6          | 0.2644 |
| 7  | ↓   | 226.6          | 0.7917 |

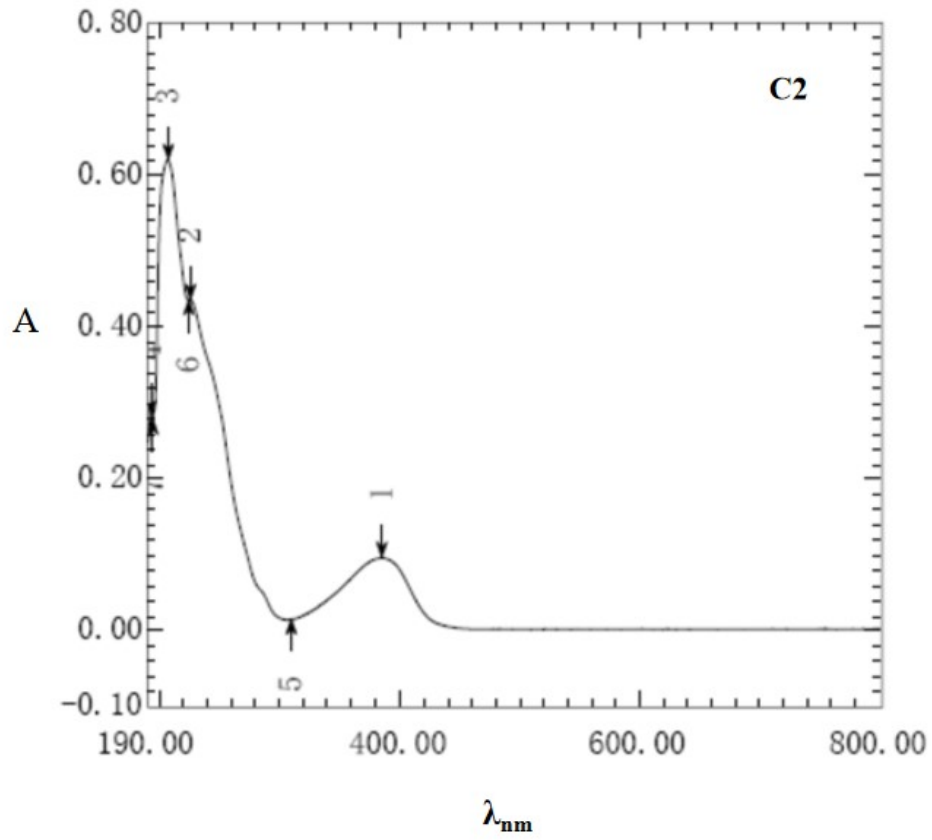

| No | P/V | $\lambda_{nm}$ | A      |
|----|-----|----------------|--------|
| 1  | ↑   | 385.0          | 0.0947 |
| 2  | ↑   | 225.5          | 0.4348 |
| 3  | ↑   | 206.5          | 0.6195 |
| 4  | ↑   | 192.7          | 0.2823 |
| 5  | ↓   | 310.1          | 0.0140 |
| 6  | ↓   | 224.6          | 0.4346 |
| 7  | ↓   | 193.6          | 0.2772 |

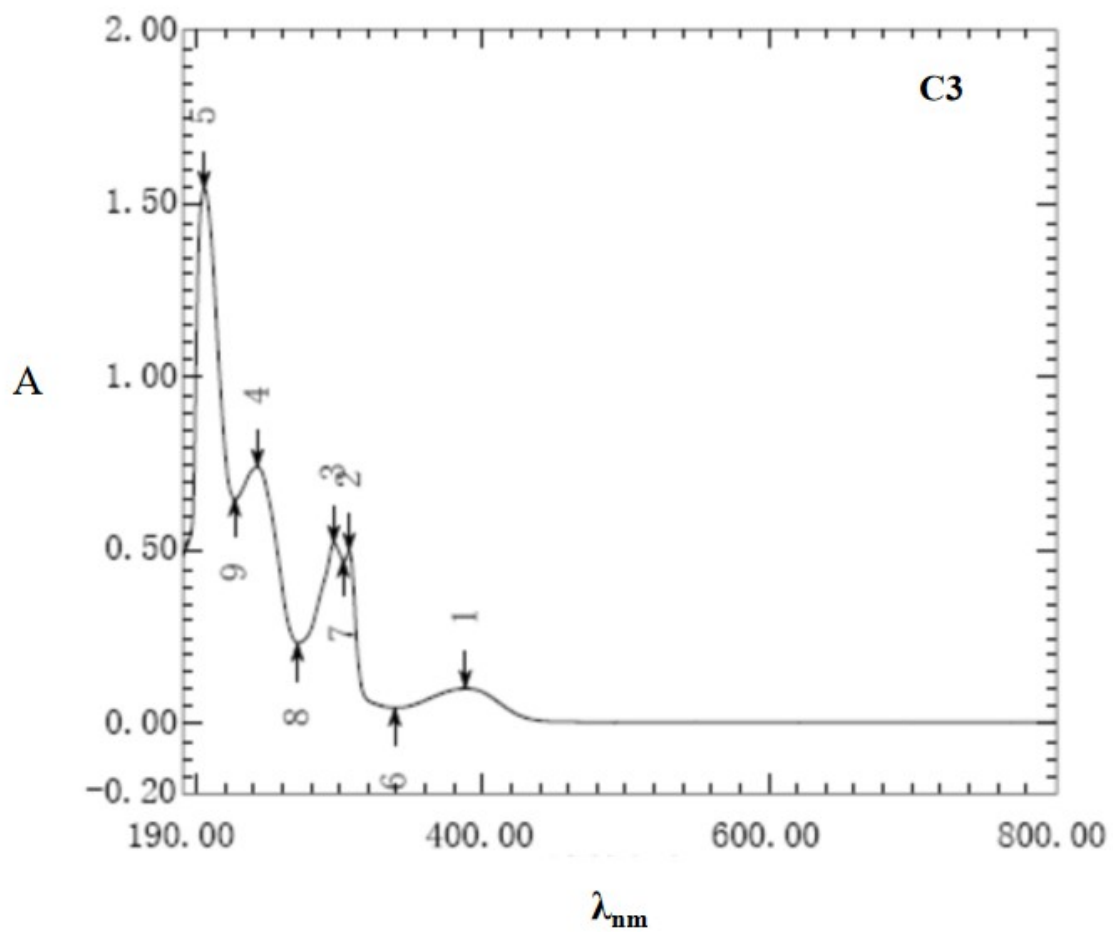

| No | P/V | $\lambda_{nm}$ | A      |
|----|-----|----------------|--------|
| 1  | ↑   | 387.3          | 0.0999 |
| 2  | ↑   | 306.4          | 0.4958 |
| 3  | ↑   | 295.6          | 0.5206 |
| 4  | ↑   | 242.1          | 0.7393 |
| 5  | ↑   | 204.6          | 1.5422 |
| 6  | ↓   | 338.7          | 0.0438 |
| 7  | ↓   | 302.7          | 0.4686 |
| 8  | ↓   | 270.7          | 0.2315 |
| 9  | ↓   | 226.3          | 0.6464 |

### 3. IR of C1, C2 and C3

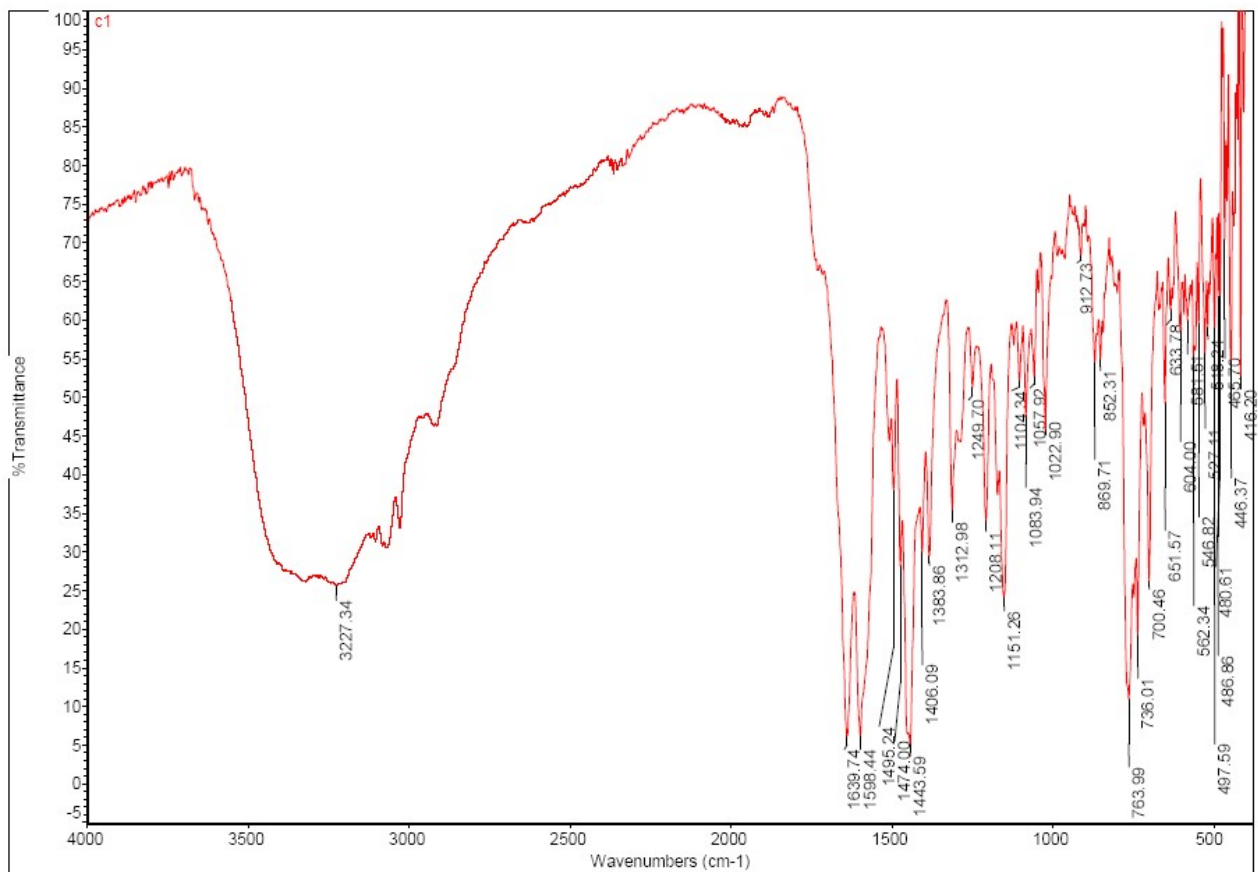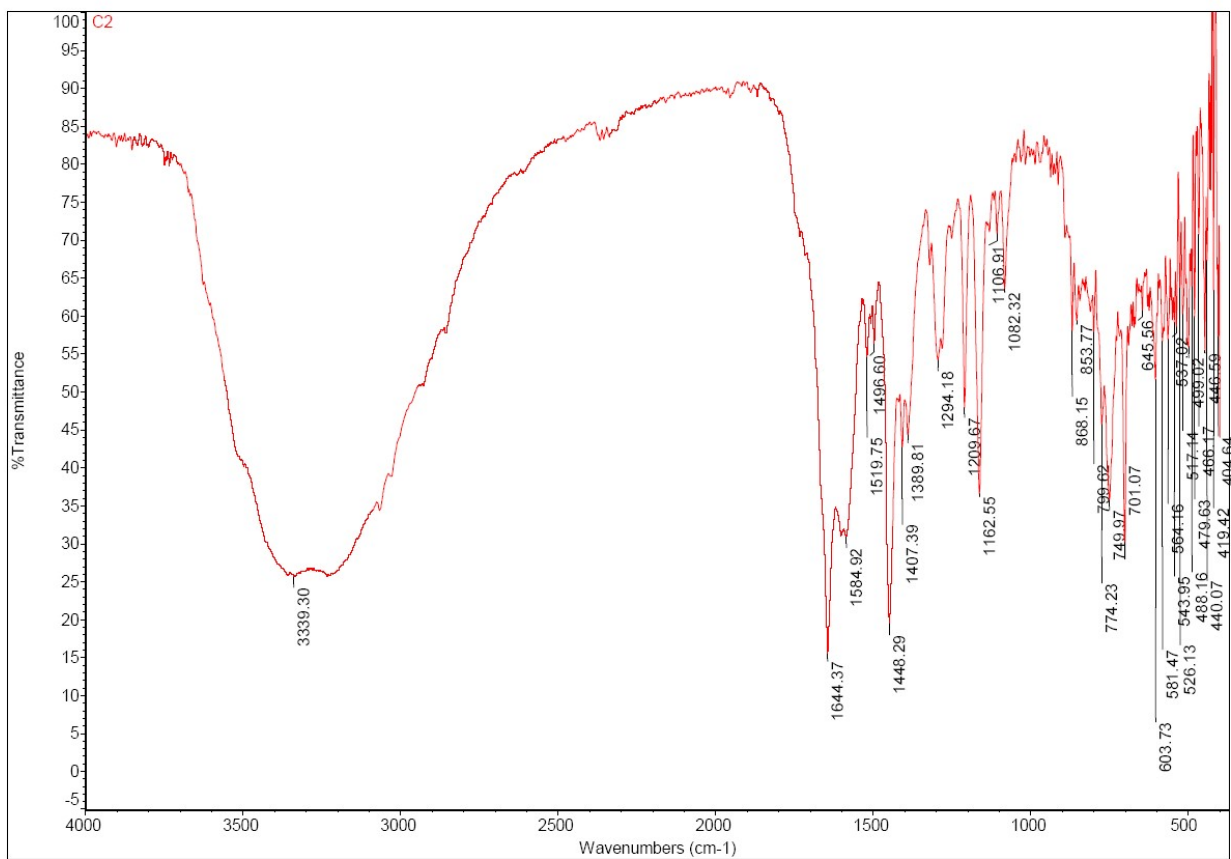

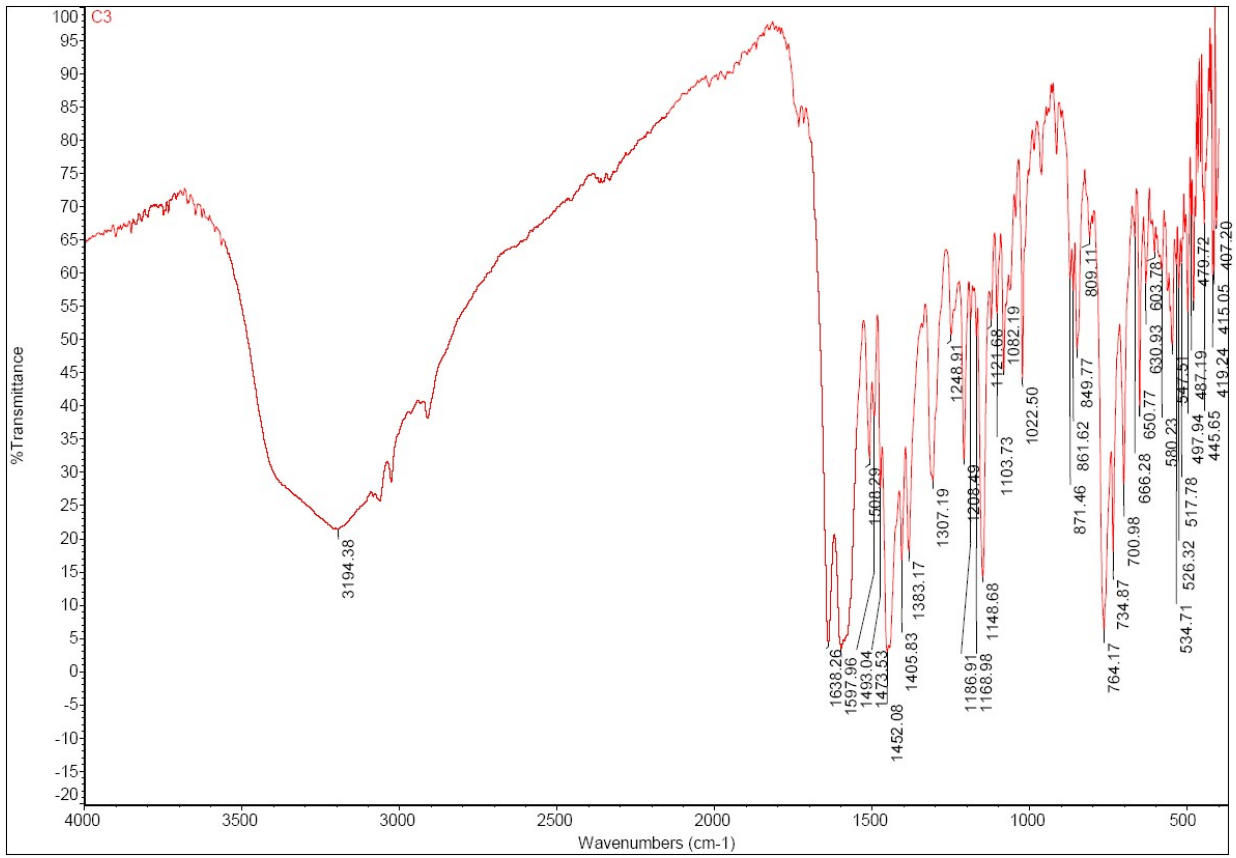

Supplement: d6dt00460a1.pdf [file d6dt00460a1.pdf]
